1  
2  
3  
4  
5  
6  
7  
8  
9  
10  
11  
12  
13  
14  
15  
16  
17  
18  
19  
20  
21

# **Autocrine STAT3 activation in HPV positive cervical cancer through a virus-driven Akt - NF $\kappa$ B - IL-6 signalling axis**

Ethan L. Morgan and Andrew Macdonald

School of Molecular and Cellular Biology, Faculty of Biological Sciences and Astbury Centre for Structural Molecular Biology, University of Leeds, Leeds, LS2 9JT, UK

To whom correspondence should be addressed:

[e.l.morgan@leeds.ac.uk](mailto:e.l.morgan@leeds.ac.uk)

[a.macdonald@leeds.ac.uk](mailto:a.macdonald@leeds.ac.uk), (0)44 113 3433053

Keywords: HPV, cancer, STAT3, signalling, IL-6

Word Count: 4058

Number of Figures: 10 (2 Supplementary)

## 22 **Abstract**

23 Persistent human papillomavirus (HPV) infection is the leading cause of cervical  
24 cancer. Although the fundamental link between HPV infection and oncogenesis is  
25 established, the specific mechanisms of virus-mediated transformation remain poorly  
26 understood. We previously demonstrated that the HPV encoded E6 protein increases  
27 the activity of the proto-oncogenic transcription factor STAT3 in primary human  
28 keratinocytes; however, the molecular basis for STAT3 activation in cervical cancer  
29 remains unclear. Here, we show that STAT3 phosphorylation in HPV positive cervical  
30 cancer cells is mediated primarily via autocrine activation by the pro-inflammatory  
31 cytokine Interleukin 6 (IL-6). Antibody-mediated blockade of IL-6 signalling in HPV  
32 positive cells inhibits STAT3 phosphorylation, whereas both recombinant IL-6 and  
33 conditioned media from HPV positive cells leads to increased STAT3 phosphorylation  
34 within HPV negative cervical cancer cells. Interestingly, we demonstrate that non-  
35 conventional activation of the transcription factor NF $\kappa$ B, involving the protein kinase  
36 Akt, is required for IL-6 production and subsequent STAT3 activation. Our data  
37 provides new insights into the molecular re-wiring of cancer cells by HPV E6. We  
38 reveal that activation of an IL-6 signalling axis drives the autocrine and paracrine  
39 phosphorylation of STAT3 within HPV positive cervical cancers cells. Greater  
40 understanding of this pathway provides a potential opportunity for the use of existing  
41 clinically approved drugs for the treatment of HPV-mediated cervical cancer.

42

## 43 **Author Summary**

44 Persistent infection with HPV is the predominant cause of anogenital and oral cancers.  
45 Transformation requires the re-wiring of signalling pathways in infected cells by virus  
46 encoded oncoproteins. At this point a comprehensive understanding of the full range

47 of host pathways necessary for HPV-mediated carcinogenesis is still lacking. In this  
48 study we describe a signalling circuit resulting in the aberrant production of the IL-6  
49 cytokine. Mediated by the HPV E6 oncoprotein, it requires activation of the NF $\kappa$ B  
50 transcription factor. The autocrine and paracrine actions of IL-6 are essential for  
51 STAT3 activation in HPV-positive cervical cancers. This study provides molecular  
52 insights into the mechanisms by which a virus encoded oncoprotein activates an  
53 oncogenic pathway, and illuminates potential targets for therapeutic intervention.  
54

## 55 **Introduction**

56 Human papillomaviruses (HPV) are a leading cause of squamous cell carcinomas of  
57 the ano-genital and oropharyngeal epithelium [1]. High risk HPVs (HR-HPV),  
58 exemplified by HPV16 and 18, are responsible for >99% of cervical, and between 30  
59 – 70% of oropharyngeal cancers [2]. HPV encodes three oncogenic proteins: E5, E6  
60 and E7, which manipulate signalling pathways necessary for cellular transformation.  
61 These include: epidermal growth factor receptor (EGFR) [3-5], Wnt [6,7] and Hippo  
62 signalling [8]. The E5 membrane protein activates EGFR signalling [9] by a mechanism  
63 linked to its virus-coded ion channel (viroporin) activity [3,10,11]. HPV E6 forms  
64 complexes with host E3 ubiquitin ligases and mediates proteasomal degradation of  
65 the p53 tumour suppressor protein, as well as increasing telomerase activity in order  
66 to prevent apoptosis and immortalise infected cells [12]. The E7 oncoprotein  
67 stimulates the DNA damage response, driving viral replication and genomic instability,  
68 simultaneously promoting the progression of cells through the S phase of the cell cycle  
69 [13,14].

70 The transcription factor signal transducer and activator of transcription (STAT) 3 is an  
71 essential regulator of cellular proliferation, differentiation and survival [15]. It is a *bona*  
72 *fide* oncogene and its aberrant activation has been observed in a growing number of  
73 malignancies [16]. As such, STAT3 has become an attractive therapeutic target in a  
74 diverse range of cancers, including bladder, ovarian and head and neck squamous  
75 cell carcinoma (HNSCC) [17].

76 Oncogenic viruses can activate STAT3 to drive cellular proliferation, necessary for  
77 viral replication and tumourigenesis [18]. Using a primary keratinocyte cell culture  
78 model, we previously demonstrated that E6 activates STAT3 signalling during the  
79 productive HPV lifecycle [19]. STAT3 activation was essential for the hyperplasia

80 observed in HPV-containing keratinocyte raft culture models. Increased STAT3  
81 protein expression and phosphorylation also correlated with cervical disease  
82 progression in a panel of cytology samples [19]. Although we identified that Janus  
83 kinase 2 (JAK2) and MAP kinases were necessary for STAT3 phosphorylation in HPV-  
84 containing primary keratinocytes, our understanding of the mechanisms by which E6  
85 mediates this process remains incomplete. Furthermore, the mechanisms  
86 underpinning STAT3 activation in cervical cancer cells also lacks a comprehensive  
87 understanding, whereas inhibition of STAT3 activity results in a profound reduction in  
88 cellular proliferation and the induction of apoptosis [20,21].

89 A number of extracellular stimuli including cytokines and growth factors induce STAT3  
90 phosphorylation and signalling [17]. This requires the phosphorylation of tyrosine 705  
91 (Y705) and serine 727 (S727), resulting in STAT3 dimerisation and nuclear  
92 translocation, where it is able to regulate gene expression [16]. In particular, members  
93 of the IL-6 family of cytokines are key mediators of STAT3 activation through their  
94 interactions with the gp130 co-receptor [22].

95 Here, we show that HPV positive cervical cancer cells have higher levels of  
96 phosphorylated STAT3 protein when compared with those that are HPV negative. This  
97 results from increased IL-6 production and release, leading to autocrine and paracrine  
98 activation of STAT3 via a signalling pathway requiring the IL-6 co-receptor gp130.  
99 Additionally, we show that IL-6 production is controlled by E6-mediated stimulation of  
100 NF- $\kappa$ B signalling, which appears to be partially dependent on a non-canonical  
101 activation of the pathway requiring the Akt protein kinase. Finally, we demonstrate a  
102 correlation between IL-6 expression and cervical disease progression, suggesting that  
103 targeting the IL-6 pathway to prevent STAT3 activation may have therapeutic benefits  
104 in cervical cancer.

## 105 **Results**

106 **STAT3 protein expression and phosphorylation is increased in HPV positive**  
107 **compared with HPV negative cervical cancer cells.** To establish the benchmark for  
108 HPV-mediated augmentation of STAT3 phosphorylation, we first analysed the level of  
109 STAT3 phosphorylation in a panel of six cervical cancer cell lines. These included two  
110 HPV negative (HPV-) lines (C33A and DoTc2), two HPV16 positive (HPV16+; SiHa  
111 and CaSKi) and two HPV18 positive (HPV18+; SW756 and HeLa) lines. Both HPV16+  
112 and HPV18+ cancer cells displayed a higher level of STAT3 phosphorylation at both  
113 (Y705 and S727) sites compared to the HPV- cell lines (significant in SiHa, CaSKi and  
114 HeLa,  $p < 0.05$ ). Additionally, the overall abundance of STAT3 was increased in the  
115 HPV+ cervical cancer cells compared with HPV- cervical cancer cells (Fig 1A and B).  
116 Together, these data demonstrate increased STAT3 expression and phosphorylation  
117 within HPV+, compared with virus negative, cervical cancer cells.

118

119 **A secreted factor in the media of HPV+ cells can induce STAT3 phosphorylation**  
120 **in HPV- cervical cancer cells.** Given that STAT3 is often regulated by extracellular  
121 signals, we investigated whether HPV promotes the secretion of factors capable of  
122 inducing STAT3 phosphorylation. C33A cells (HPV-) incubated with conditioned media  
123 (CM) from HeLa cells (HPV18+) displayed marked STAT3 phosphorylation on both  
124 Y705 and S727 residues, reaching a peak between 30 minutes and 1 hour (Fig 2A).  
125 Similar results were observed with CaSKi-CM (HPV16+) (Fig 2B). Accordingly, HeLa  
126 or CaSKi-CM induced increased STAT3 nuclear accumulation within C33A cells (Fig  
127 2C and D). These data indicate that a secreted factor in the media from HPV+ cells  
128 induces STAT3 phosphorylation in target cells.

129

130 **IL-6 secretion is increased in HPV+ cervical cancer cells.** To identify the secreted  
131 factor responsible for inducing STAT3 phosphorylation, we focused on members of  
132 the IL-6 family of pro-inflammatory cytokines, as these have a well-studied role in the  
133 activation of STAT3 [23]. Firstly, the mRNA expression levels of key members of the  
134 family were analysed by RT-qPCR. In both HeLa and CaSKi cells, *IL6*, *IL10*, *LIF*  
135 (Leukaemia inhibitory factor) and *OSM* (Oncostatin M) mRNA levels were significantly  
136 higher than in C33A cells (Fig 3A), with *IL-6* showing the greatest increase. Building  
137 on this, we analysed *IL-6* mRNA expression in all six cervical cancer cell lines. In both  
138 HPV16+ and HPV18+ cervical cancer cells, a significantly higher level of *IL-6* mRNA  
139 expression was observed compared with HPV- cervical cancer cells (Fig 3B), which  
140 correlated with intracellular IL-6 protein expression when analysed by western blot  
141 (Fig 3C). Finally, to confirm that the IL-6 protein detected was secreted, an IL-6 specific  
142 ELISA was performed. IL-6 was undetectable in the culture medium of HPV- cells; in  
143 contrast a significant quantity of IL-6 could be detected the culture medium of both  
144 HPV16+ and HPV18+ cells (SiHa,  $p = 0.03$ ; CaSKi,  $p = 0.0004$ ; SW756,  $p = 0.03$ ;  
145 HeLa,  $p = 0.00004$ ). These data suggest that IL-6 expression and secretion is much  
146 higher in HPV+ cervical cancer cells compared with uninfected lines.

147

148 **IL-6 binding to gp130-containing receptor complexes is required for STAT3**  
149 **phosphorylation and nuclear translocation in cervical cancer cells.** IL-6 signalling  
150 is initiated by an interaction between IL-6 and the IL-6 receptor (IL-6R) – gp130 co-  
151 receptor complex [17]. In cervical cancer cells, blocking antibodies against IL-6 and  
152 gp130 were utilised to confirm that they were required for STAT3 phosphorylation.  
153 Firstly, we confirmed that IL-6 was the mediator of STAT3 phosphorylation secreted  
154 by HPV+ cells by pre-incubating C33A cells with the gp130 blocking antibody before

155 treating them with HeLa or CaSKi-CM. Separately, we added the neutralising IL-6  
156 antibody to the CM before addition to cells. CM from HPV+ cells induced STAT3  
157 phosphorylation in HPV- cells; however, pre-incubation of C33A cells with gp130  
158 blocking antibody, or the addition of CM containing the neutralising IL-6 antibody,  
159 blocked the ability of HPV+ conditioned media to induce STAT3 phosphorylation (Fig  
160 4A) and nuclear translocation (Fig 4B). This suggests that IL-6 secretion from HPV+  
161 cervical cancer cells is able to induce the paracrine activation of STAT3 in HPV-  
162 cervical cancer cells via IL-6/gp130 signalling.

163 Finally, to confirm that IL-6/gp130 signalling was required for the autocrine activation  
164 of STAT3 in HPV+ cervical cancer cells, HeLa cells were pre-incubated with IL-6 and  
165 gp130 neutralizing antibodies. Incubation with either neutralising antibody led to a  
166 reduction in STAT3 phosphorylation on both phosphorylation sites, accompanied by a  
167 block in STAT3 nuclear translocation, suggesting that IL-6 is required for the autocrine  
168 activation of STAT3 (Fig 4C and D). Taken together, these data demonstrate that HPV  
169 induces autocrine and paracrine IL-6/STAT3 signalling in cervical cancer.

170

171 **HPV E6 induction of IL-6 expression is required for STAT3 phosphorylation.** The  
172 increased STAT3 phosphorylation observed in HPV containing keratinocytes is  
173 dependent on the E6 oncoprotein [19]. Additionally, HPV16 E6 has been previously  
174 demonstrated to induce IL-6 secretion in non-small cell lung cancer (NSCLC) cells  
175 [24]. Therefore, the ability of E6 to induce IL-6 expression in cervical cancer cells was  
176 assessed. To this end, we first transfected C33A with an IL-6 promoter luciferase  
177 reporter in combination with a GFP-E6 expression plasmid or the GFP vector.  
178 Expression of HPV18 E6 significantly increased IL-6 promoter activity by ~4-fold  
179 compared with the GFP control (Fig 5A;  $p = 0.002$ ). This corresponded to a ~4-fold



180 increase in endogenous *IL-6* mRNA expression (Fig 5B;  $p= 0.01$ ) and IL-6 protein  
181 expression (Fig 5C). Finally, E6 expression resulted in a significant increase in IL-6  
182 secretion (Fig 5D;  $p= 0.0245$ ). To demonstrate that endogenous E6 could induce IL-6  
183 expression in HPV+ cells, HeLa (Fig 5) or CaSKi (Supplementary Fig 1) cells were  
184 treated with two E6 specific siRNAs. Knockdown of E6 expression led to a significant  
185 reduction in *IL-6* mRNA expression (Fig 5E;  $p= 0.046$  and Supplementary Fig 1A), IL-6  
186 protein expression (Fig 5F and Supplementary Fig 1B) and secretion (Fig 5G;  $p= 0.003$   
187 and Supplementary Fig 1C). Together, these data demonstrate that HPV E6 increases  
188 the expression and secretion of IL-6.

189 To confirm if IL-6 expression was necessary for E6-mediated STAT3 phosphorylation,  
190 HPV18 E6 was expressed in C33A cells which were then treated with neutralising  
191 antibodies against either IL-6 or the gp130 co-receptor. As we have previously shown,  
192 the expression of HPV E6 induced STAT3 phosphorylation at both Y705 and S727  
193 residues in C33A cells [19]. Treatment of E6 expressing cells with neutralising  
194 antibodies against IL-6 or gp130 led to the loss of STAT3 phosphorylation (Fig 5H).  
195 This suggests that the E6-mediated induction of IL-6 expression is essential for the  
196 autocrine phosphorylation of STAT3 in HPV+ cervical cancer cells.

197

198 **HPV E6 activates NF $\kappa$ B to induce IL-6 expression.** Several signalling pathways can  
199 induce IL-6 expression, including the transcription factor NF $\kappa$ B, which is activated in  
200 response to a range of extracellular ligands such as TNF $\alpha$  [25]. HPV E6 has previously  
201 been shown to activate NF $\kappa$ B signalling under hypoxic conditions [26,27]. To assess  
202 whether NF $\kappa$ B is necessary for the increased IL-6 expression, we first tested whether  
203 expression of E6 in isolation would activate NF $\kappa$ B in C33A cells. Using an NF $\kappa$ B driven  
204 luciferase reporter plasmid, overexpression of E6 induced NF $\kappa$ B activity ~3-fold

205 compared to a GFP control (Fig 6A;  $p=0.001$ ).

206 Canonical NF $\kappa$ B signalling results in the phosphorylation of the p65 subunit and its  
207 nuclear translocation, where it is transcriptionally active in complex with additional  
208 NF $\kappa$ B subunits including p50 [25]. Over expression of E6 in C33A cells induced robust  
209 p65 phosphorylation, without affecting total p65 protein levels (Fig 6B). In contrast,  
210 siRNA knockdown of E6 in HeLa cells reduced p65 phosphorylation (Fig 6C), together  
211 suggesting that HPV E6 activates NF $\kappa$ B signalling.

212 To assess if NF $\kappa$ B activity was required for the increase in IL-6 production observed  
213 in E6 expressing cells, we employed a dual approach to prevent NF $\kappa$ B activation in  
214 C33A cells overexpressing E6. Cells were treated either with a small molecule inhibitor  
215 (IKKi) targeting the IKK $\alpha$ / $\beta$  complex, which is required to phosphorylate and activate  
216 NF $\kappa$ B or transfected with a plasmid encoding a mutant I $\kappa$ B $\alpha$  protein (I $\kappa$ Bm), which  
217 cannot be degraded and as such retains NF $\kappa$ B in the cytosol in an inactive form [28].

218 Expression of E6 increased *IL-6* mRNA production, and inhibition of NF $\kappa$ B using either  
219 IKKi or I $\kappa$ Bm led to a significant reduction in *IL-6* mRNA expression (Fig 6D; IKKi,  
220  $p=0.00001$ ; I $\kappa$ Bm,  $p=0.04$ ), IL-6 protein levels (Fig 6E) and secretion (Fig 6F; IKKi,  
221  $p=0.02$ ; I $\kappa$ Bm,  $p=0.007$ ). Importantly, both strategies effectively inhibited NF $\kappa$ B activity  
222 as judged by a reduction in p65 phosphorylation (Fig 6E).

223 To confirm if NF $\kappa$ B activity was also required for mediating the increased IL-6 levels  
224 seen in HPV+ cancer cells, NF $\kappa$ B activity was blocked in HeLa cells. Inhibition of NF $\kappa$ B  
225 led to a reduction in *IL-6* mRNA expression (Fig 6F; IKKi,  $p=0.03$ ; I $\kappa$ Bm,  $p=0.02$ ), IL-6  
226 protein levels (Fig 6H) and secretion (Fig 6I; IKKi,  $p=0.007$ ; I $\kappa$ Bm,  $p=0.007$ ).

227 Collectively, these data demonstrate that HPV E6-mediated IL-6 expression is  
228 dependent on NF $\kappa$ B activity.

229

230 **NF $\kappa$ B is required for STAT3 phosphorylation in E6 expressing cells.**

231 As NF $\kappa$ B was required for the increase in IL-6 expression observed in HPV+ cancer  
232 cell lines, it was necessary to next test whether NF $\kappa$ B was also required for the  
233 activation of STAT3. First, we tested the ability of an inducer of NF $\kappa$ B activation, TNF $\alpha$ ,  
234 to induce STAT3 phosphorylation. Treatment of serum starved C33A cells with TNF $\alpha$   
235 increased p65 phosphorylation, which peaked at 0.5 hours after treatment (Fig 7A;  
236 lane 3). TNF $\alpha$  treatment also induced IL-6 expression; starting at 0.5 hours post  
237 treatment and remained high up to 24 hours post treatment. TNF $\alpha$  treatment also led  
238 to an increase in STAT3 phosphorylation at both Y705 and S727 residues; however,  
239 this peaked later, at 2 hours (Fig 7A; lane 5). TNF $\alpha$ -dependent nuclear translocation  
240 of STAT could also be observed 2 hours post treatment (Fig 7B).

241 To assess the importance of NF $\kappa$ B activation for STAT3 phosphorylation, HPV E6 was  
242 first overexpressed in C33A cells, with or without treatment with the NF $\kappa$ B inhibitor  
243 IKKi, or co-expression of I $\kappa$ Bm. E6 overexpression noticeably increased p65 and  
244 STAT3 phosphorylation and inhibition of NF $\kappa$ B using either approach led to a loss of  
245 STAT3 phosphorylation (Fig 7C). Additionally, blockade of NF $\kappa$ B also led to a  
246 reduction in STAT3 phosphorylation in HeLa cells (Fig 7D and E), suggesting that E6  
247 mediated STAT3 phosphorylation is depended on NF $\kappa$ B activity. Finally, to ascertain  
248 if NF $\kappa$ B was essential for the paracrine activation of STAT3 in C33A cells, we took  
249 conditioned media from HeLa cells in which NF $\kappa$ B was inhibited and added this to  
250 C33A cells. This conditioned media failed to induce STAT3 phosphorylation (Fig 7F)  
251 and nuclear translocation (Fig 7G). Importantly, inhibition of NF $\kappa$ B activity had no  
252 effect on STAT3 phosphorylation or nuclear translocation mediated by treatment with

253 exogenous IL-6 (Supp Fig 2A and 2B), demonstrating that NF $\kappa$ B is upstream of IL-6  
254 secretion. Together, these data suggest that NF $\kappa$ B is required for the autocrine and  
255 paracrine activation of STAT3.

256

257 **The protein kinase Akt contributes to NF $\kappa$ B activation and IL-6 production in E6**  
258 **expressing cells.** NF $\kappa$ B is activated by multiple upstream signalling components in a  
259 stimulus and tissue-dependent manner [29]. The PI3K/Akt signalling pathway is  
260 frequently activated in cervical cancers due to mutations in the *PIK3CA* gene [30], and  
261 Akt can activate NF $\kappa$ B in some cancers [31,32]. Furthermore, Akt is a known mediator  
262 of IL-6 expression [33]. We therefore assessed if Akt was involved in NF $\kappa$ B activation  
263 and IL-6 secretion in HPV+ cervical cancer. First, we confirmed that E6 can activate  
264 Akt, as measured by an increase in Akt phosphorylation, as has been previously  
265 shown [34]. Over expression of E6 in C33A cells led to a marked increase in Akt  
266 phosphorylation at both threonine 308 and serine 473, without affecting total Akt  
267 protein levels (Fig 8A). In addition, siRNA knockdown of E6 in HeLa cells reduced Akt  
268 phosphorylation (Fig 8B), together confirming that HPV E6 activates Akt.

269 To interrogate the contribution of Akt activation to IL-6 production observed in E6  
270 expressing cells, cells were treated either with a potent allosteric inhibitor of Akt (Akti),  
271 targeting the Akt1 and 2 isoforms [35] or transfected with a plasmid encoding a  
272 catalytically inactive Akt mutant (Akt-DN) [36]. Inhibition of Akt by either approach led  
273 to significant reduction in *IL-6* mRNA expression (Fig 8C; Akti,  $p=0.004$ ; Akt-DN,  
274  $p=0.04$  and secretion (Fig 8E; Akti,  $p= 0.05$ ; Akt-DN,  $p=0.02$ ).

275 To confirm that the Akt-mediated increase in IL-6 was transduced via NF $\kappa$ B, we  
276 measured p65 phosphorylation levels in C33A cells expression HPV E6 treated with  
277 either Akti or co-transfected with Akt-DN. We observed a loss of Akt phosphorylation,

278 indicating that the inhibition strategy was successful, and this was coupled with a  
279 reduction in IL-6 protein expression (Fig 8D) and a partial reduction in p65  
280 phosphorylation, suggesting that Akt may act upstream of NF $\kappa$ B in the regulation of  
281 IL-6.

282 We also validated the impact of Akt inhibition on IL-6 production in both HeLa and  
283 HPV16+ CaSKi cells. In contrast to HeLa cells, which have wild type *PIK3CA*, CaSKi  
284 cells express the E545K mutant of *PIK3CA*, which results in constitutive activation of  
285 PI3K/Akt signalling [37]. Interestingly, inhibition of Akt in CaSKi cells had a greater  
286 effect in reducing *IL-6* mRNA expression (Fig 8F), IL-6 protein levels (Fig 8G) and  
287 secretion (Fig 8H) than in HeLa cells. Furthermore, inhibition of Akt led to a greater  
288 reduction in p65 phosphorylation in CaSKi cells. These data confirm that Akt signalling  
289 contributes to IL-6 production in HPV cervical cancer cells through the regulation of  
290 NF $\kappa$ B.

291

## 292 **IL-6 expression correlates with cervical disease progression.**

293 The IL-6/STAT3 signalling axis is deregulated in several cancers [17]. Additionally, IL-  
294 6 is over expressed in lung cancer and head and neck cancers [38,39]. We therefore  
295 analysed cervical liquid-based cytology samples from a cohort of HPV16+ patients  
296 representing the progression of disease development (CIN1-CIN3) and HPV negative  
297 normal cervical tissue to explore its role in cervical disease. Increased levels of *IL-6*  
298 mRNA significantly correlated with disease progression through CIN1-CIN3 (Fig 9A;  
299 CIN1, p= 0.01; CIN2, p= 0.004; CIN3, p=0.00005), with the greatest increase observed  
300 in CIN3 samples when compared with normal cervical tissue. Additionally, IL-6 protein  
301 levels also correlated with disease progression (Fig 9B and C; CIN1, p= NS; CIN2, p=  
302 0.0003; CIN3, p=0.04), again showing the largest increase in CIN3. Finally, by mining

303 an available microarray database of normal cervical samples against cervical cancer  
304 samples, we observed a statistically significant increase in *IL-6* mRNA expression in  
305 the cervical cancer samples (Fig 9D;  $p=0.03$ ). Together, these data demonstrate that  
306 *IL-6* expression is increased in HPV associated cervical disease and in HPV+ cervical  
307 cancer.

308

### 309 **Discussion**

310 Several oncogenic viruses activate STAT3 to drive cellular proliferation, viral  
311 replication and tumourigenesis [18]. Using a primary cell culture model, we have  
312 previously shown that E6 activates the STAT3 signalling pathway in primary  
313 keratinocytes during the HPV lifecycle [19]. Additionally, we showed that STAT3  
314 activation and expression correlates with cervical disease progression. Although we  
315 demonstrated that JAK2 and MAP kinases are responsible for STAT3 phosphorylation  
316 in HPV containing cells, the host factors co-opted by HPV E6 required to drive these  
317 events are poorly understood. Furthermore, given that previous work has  
318 demonstrated that STAT3 inhibition is deleterious to HPV cancer cell survival [20,21],  
319 it was imperative to obtain a more comprehensive understanding of the host pathways  
320 necessary for STAT3 activation.

321 Oncogenic viruses often increase the production of pro-inflammatory cytokines as a  
322 conserved mechanism to enhance STAT3 signalling. In particular, IL-6 is over-  
323 expressed in diverse cancers and correlates with increased STAT3 activity [17]. IL-6  
324 displays many pleiotropic functions, being both pro-inflammatory and  
325 immunosuppressive by interacting with the surrounding stroma of tumours [40]. In  
326 HNSCC and oral squamous cell carcinoma, serum levels of IL-6 level are significantly  
327 higher than control patients and serum IL-6 is a potential biomarker for these cancers

328 [41]. Additionally, targeting IL-6 in combination with EGFR inhibitors such as  
329 Cituximab is currently being investigated as a potential therapy for HNSCC due to the  
330 resistance to EGFR inhibition seen in many tumours [42,43].

331 IL-6 expression can be regulated by the transcription factor NF $\kappa$ B. In canonical NF $\kappa$ B  
332 signalling, various stimuli such as pro-inflammatory cytokines including Tumour  
333 Necrosis Factor  $\alpha$  (TNF $\alpha$ ), initiate a signalling cascade resulting in the phosphorylation  
334 of I $\kappa$ B $\alpha$  a negative regulator of the NF $\kappa$ B pathway, by I $\kappa$ B kinases (IKKs). This results  
335 in the proteasomal degradation of I $\kappa$ B $\alpha$  and nuclear translocation of the NF $\kappa$ B  
336 components p65 and p50 [25].

337 Kaposi's Sarcoma associated Herpesvirus (KSHV) down regulates I $\kappa$ B $\alpha$  via the viral  
338 miRNA miR-K12-1, leading to enhanced IL-6 expression and STAT3 activation [44].  
339 Both Hepatitis C virus (HCV) core protein and Human Cytomegalovirus (HCMV) US28  
340 protein induce STAT3 phosphorylation and nuclear translocation in an autocrine  
341 manner via up regulation of IL-6 [45,46]

342 In cervical cancer, IL-6 expression promotes tumour proliferation by inducing vascular  
343 epithelial growth factor (VEGF)-dependent angiogenesis in a STAT3 dependent  
344 manner [47] and has also been suggested as a potential biomarker [48]. The HPV E6  
345 oncoprotein has been demonstrated to be required for the expression and secretion  
346 of IL-6 NSCLC cells [24]; however, the role of E6 in driving IL-6 expression in cervical  
347 cancer is unclear. Furthermore, the contribution of IL-6 to STAT3 activation in cervical  
348 cancer is poorly defined. Our data show that the increased phosphorylation of STAT3  
349 in HPV+ cervical cancer cells was attributed to an increase in IL-6 expression by HPV  
350 E6 and the induction of autocrine/paracrine IL-6/gp130/STAT3 signalling. In cervical  
351 cancer cells, EGFR signalling can induce STAT3 activation [49]; however, the data  
352 here identified that blockade of IL-6 or gp130 signalling using neutralising antibodies

353 abolished STAT3 phosphorylation, suggesting that IL-6/gp130 is the major  
354 determinant for STAT3 phosphorylation in HPV+ cervical cancer cells.  
355 We identified NF $\kappa$ B as an essential upstream mediator of IL-6 expression. NF $\kappa$ B is a  
356 key component of the inflammatory response, which is a key hallmark of cancer [50].  
357 The induction of inflammation by diverse mechanisms contributes to around 20% of  
358 cancers, including the role of inflammatory bowel disease in the development of  
359 colorectal cancer (CRC) [51]. Importantly, infection also plays an important role in  
360 inflammation-driven cancer; *H. pylori* can lead to the induction of stomach cancers,  
361 whilst infection with hepatitis C viruses can lead to development of hepatocellular  
362 carcinoma [52-54]. Previous data suggests that inflammation induced by HPV  
363 infection may contribute to HPV induced cervical cancers [55,56]. Indeed, several  
364 genes known to be induced by the inflammatory response, including COX-2 [57], are  
365 up-regulated in cervical cancer.

366 The role of NF $\kappa$ B in cervical carcinomas remains controversial, with HPV implicated  
367 in both activation and inhibition of the transcription factor [26,58,59]. HPV E6 was  
368 demonstrated to increase the expression of NF $\kappa$ B components and induce NF $\kappa$ B DNA  
369 binding activity, increasing pro-inflammatory cytokine expression [60]. Additionally, E6  
370 reduces the expression of the deubiquitinase CYLD, a known negative regulator of  
371 NF $\kappa$ B signalling, in hypoxic cells [27]. In contrast, E6 has been shown to inhibit NF $\kappa$ B  
372 transcriptional activity, whilst HPV E7 can attenuate p65 nuclear translocation [61].  
373 The data presented here demonstrates that HPV18 E6 increases the phosphorylation  
374 of p65, essential for the nuclear translocation and transactivation ability of p65.  
375 Additionally, we demonstrate that NF $\kappa$ B is essential for IL-6 expression in HPV+  
376 cervical cancer cells.



377 To gain mechanistic insight into the regulation of IL-6 production in HPV+ cervical  
378 cancer cells, we focused on the signalling pathways leading to NF $\kappa$ B activation. The  
379 protein kinase Akt can regulate NF $\kappa$ B activation under certain circumstances. In  
380 PTEN-null cells, Akt activates NF $\kappa$ B through binding of the downstream components  
381 mTOR and Raptor to the IKK complex, stimulating NF $\kappa$ B activation [62]. Additionally,  
382 Akt can directly phosphorylate and activate IKK $\alpha$  at T23 to enhance p65  
383 phosphorylation [63]. Our data demonstrate that Akt contributes to the phosphorylation  
384 of p65 and the expression on IL-6 in HPV+ cervical cancer; however, inhibition of Akt  
385 only partially reduced IL-6 expression, suggesting alternative components upstream  
386 may be involved in NF $\kappa$ B mediated IL-6 expression.

387 In cervical cancer, the *PIK3CA* gene is extensively mutated, with the most common  
388 mutation (E545K) resulting in constitutive PI3K/Akt signalling [64]. This oncogenic  
389 mutation can activate IKK/NF $\kappa$ B signalling and increase IL-6 secretion and paracrine  
390 STAT3 activation in epithelial cells [65]. We therefore compared the effect of Akt  
391 inhibition on IL-6 production in two cervical cancer cell lines – one with wild type  
392 *PIK3CA* (HeLa) and one that has the E545K mutant (CaSKi). We demonstrate that in  
393 cells expressing the E545K mutation, and thus having constitutive PI3K/Akt signalling,  
394 Akt inhibition has a greater contribution to the NF $\kappa$ B/IL-6 signalling axis than in cells  
395 expressing wild type *PIK3CA*. This suggests that targeting the PI3K/Akt pathway in  
396 cervical cancers that harbour *PIK3CA* activating mutations, such as E545K, may have  
397 therapeutic benefit due to inhibition of NF $\kappa$ B/IL-6 signalling and paracrine STAT3  
398 activation. Indeed, it has recently been demonstrated that the *PIK3CA* E545K mutant  
399 confers resistance to cisplatin, suggesting that a combination treatment of cisplatin  
400 and a PI3K inhibitor may have synergistic effects in cervical cancer [66].

401 The data presented here demonstrates that NF $\kappa$ B is essential for the induction of IL-

402 6 and the autocrine/paracrine induction of STAT3 phosphorylation in HPV+ cervical  
403 cancer cells. Further, we identify that the protein kinase Akt lies upstream of NF $\kappa$ B/IL-6  
404 signalling as a differential regulator depending on the cellular context due to activating  
405 *PIK3CA* mutations. This may allow for the stratification of a subset of cervical cancers  
406 that may benefit from a combination treatment of a PI3K inhibitor, such as the pan-  
407 PI3K inhibitor buparlisib (BKM120) or the PI3K $\alpha$ -selective inhibitor alpelisib (BYL719)  
408 [67], with standard therapies such as cisplatin.  
409

## 410 **Methods and Materials**

### 411 **Cell Culture**

412 C33A (HPV negative cervical carcinoma), DoTc2 4510 (HPV negative cervical  
413 carcinoma), SiHa (HPV 16 positive cervical squamous carcinoma), CaSKi (HPV 16  
414 positive cervical squamous carcinoma), SW756 (HPV 18 positive squamous  
415 carcinoma) and HeLa (HPV 18 positive cervical epithelial adenocarcinoma) cells were  
416 purchased from ATCC and grown in Dulbecco's modified Eagle's media (DMEM)  
417 supplemented with 10% Foetal Bovine Serum (FBS) (ThermoFischer Scientific, USA)  
418 and 50 U/ml penicillin/streptomycin (Lonza).

419

### 420 **Inhibitors and Cytokines**

421 The IKK $\alpha/\beta$  inhibitor IKK inhibitor VII was purchased from Calbiochem and used at a  
422 final concentration of 5  $\mu$ M unless otherwise stated. The Akt1/2 inhibitor Akt VIII was  
423 purchased from Calbiochem and used at a final concentration of 5  $\mu$ M unless  
424 otherwise stated. Recombinant human IL-6 was purchased from R&D Systems and  
425 used at a final concentration of 20 ng/mL unless otherwise stated. Recombinant TNF $\alpha$   
426 was purchased from PeproTech EC Ltd and used at a final concentration of 10 ng/mL.  
427 All compounds were used at concentrations required to minimise potential off-target  
428 activity. Neutralising IL-6 antibody (ab6628) was purchased from Abcam and used at  
429 a final dilution of 1 1:400. Neutralising gp130 antibody (MAB228) was purchased from  
430 R&D Systems and used at a final concentration of 1  $\mu$ g/mL.

431

### 432 **Plasmids and siRNAs**

433 Plasmids expressing HPV18 E6 sequences were amplified from the HPV18 genome  
434 and cloned into peGFP-C1 with *Sall* and *Xmal* restriction enzymes. The plasmid

435 driving Firefly luciferase from the IL-6 promoter was a kind gift from Prof Derek Mann  
436 (University of Newcastle) and used as previously described [68]; the ConA promoter  
437 (that contains tandem NF $\kappa$ B response elements) [69] and a constitutive Renilla  
438 luciferase reporter (pRLTK) were previously described [68]. pLNCX1 HA AKT1 were  
439 purchased from Addgene (Cambridge, MA, USA) and we thank the principle  
440 investigators Jim Darnell, David Baltimore, Linzhao Cheng and Domencino Accili for  
441 depositing them. The I $\kappa$ B $\alpha$  S33/36A mutant was a kind gift from Prof Ronald Hay  
442 (University of Dundee). For siRNA experiments, two siRNA sequences specifically  
443 targeting HPV18 E6 were purchased from GE Healthcare with the following  
444 sequences: 5'CUAACACUGGGUUAUACAA'3 and 5'CTAACTAACACTGGGTTAT'3.  
445 For HPV16, a single siRNA targeting the HPV16 E6 protein was purchased from Santa  
446 Cruz Biotechnology (SCBT; sc-156008). For each experiment, 40nM of pooled siRNA  
447 was used and cell lysates were harvested after 72 hours.

448

#### 449 **Transfections and mammalian cell lysis**

450 Transient transfections were performed with a DNA to Lipofectamine® 2000  
451 (ThermoFischer) ratio of 1:2.5. 48 h post transfection, cells were lysed in Leeds lysis  
452 buffer for western blot [69].

453

#### 454 **Western Blotting**

455 Total protein was resolved by SDS-PAGE (10-15% Tris-Glycine), transferred onto  
456 Hybond nitrocellulose membrane (Amersham biosciences) and probed with antibodies  
457 specific for phospho-STAT3 (S727) (ab32143, abcam), phospho-STAT3 (Y705)  
458 (9131, Cell Signalling Technology (CST)), STAT3 (124H6: 9139, CST), phospho-NF-  
459  $\kappa$ B p65 (S536) (93H1; 3033, CST), NF- $\kappa$ B p65 (D14E12; 8242, CST), phospho-Akt

460 (T308) (244F9; 4056, CST), phospho-Akt (S473) (D9E; 4060, CST), Akt (9272, CST),  
461 IL-6 (ab6672, abcam), HA (HA-7, Sigma H9658), GFP (B-2: sc-9996, SCBT) and  
462 GAPDH (G-9, SCBT). Western blots were visualized with species-specific HRP  
463 conjugated secondary antibodies (Sigma) and ECL (Thermo/Pierce).

464

#### 465 **Retrovirus transduction**

466 pLNCX AKT vector (Addgene, 9006) were transfected into HEK293TT cells with  
467 murine retrovirus envelope and GAG/polymerase plasmids (kindly provided by  
468 Professor Greg Towers, University College London) using PEI transfection reagent as  
469 previously described [19]. After 48 hours the media was removed from the HEK293TT  
470 cells and added to HeLa cells for 16 hours. After this time, the virus was removed and  
471 replaced with DMEM and cells were harvested 48 hours after transduction.

472

#### 473 **Quantitative Real-time PCR**

474 Total RNA was extracted using the E.Z.N.A. Total RNA Kit I (Omega Bio- Tek)  
475 according to the manufacture's protocol. One  $\mu$ g of total RNA was DNase treated  
476 following the RQ1 RNase-Free DNase protocol (Promega) and then reverse  
477 transcribed with a mixture of random primers and oligo(dT) primers using the  
478 qScript<sup>TM</sup> cDNA SuperMix (Quanta Biosciences) according to instructions. qRT- PCR  
479 was performed using the QuantiFast SYBR Green PCR kit (Qiagen). The PCR  
480 reaction was conducted on a Corbett Rotor-Gene 6000 (Qiagen) as follows: initial  
481 activation step for 10 min at 95°C and a three-step cycle of denaturation (10 sec at  
482 95°C), annealing (15 sec at 60°C) and extension (20 sec at 72°C) which was repeated  
483 40 times and concluded by melting curve analysis. The data obtained was analysed  
484 according to the  $\Delta\Delta C_t$  method using the Rotor-Gene 6000 software [70]. Specific

485 primers were used for each gene analysed and are shown in Table 1. U6 served as  
486 normaliser gene.

487

### 488 **Luciferase Reporter Assays**

489 Cells were seeded into 12 well dishes and transfected the following day using PEI with  
490 reporter plasmids expressing firefly luciferase under the control of the *IL-6* promoter  
491 or the *ConA* promoter, which contains tandem repeats of a  $\kappa$ B-response element  
492 [68,71]. Where appropriate, cells were co-transfected with plasmids expressing GFP  
493 or GFP-E6. To normalise for transfection efficiency, pRLTK Renilla luciferase reporter  
494 plasmid was added to each transfection. After 24 hours, samples were lysed in passive  
495 lysis buffer (Promega) and activity measured using a dual-luciferase reporter assay  
496 system (Promega) as described [72].

497

### 498 **Immunofluorescent Staining**

499 Cells were seeded onto coverslips and, 24 hr later, were transfected as required. 24  
500 hr after transfection, cells were fixed with 4 % paraformaldehyde for 10 min and then  
501 permeabilised with 0.1 % (v/v) Triton for 15 minutes. Cells were then incubated in  
502 primary antibodies in PBS with 4 % BSA overnight at 4°C. Primary antibodies were  
503 used at a concentration of 1:400. Cells were washed thoroughly in PBS and then  
504 incubated with Alex-fluor conjugated secondary antibodies 594 and Alexa 488  
505 (1:1000) (Invitrogen) in PBS with 4% BSA for 2 hours. DAPI was used to visualise  
506 nuclei. Coverslips were mounted onto slides with Prolong Gold (Invitrogen).

507

### 508 **ELISA**

509 The human IL-6 DuoSet® ELISA was purchased from R&D Systems and was used

510 according to the manufacturer's instructions.

511

### 512 **Microarray analysis**

513 For microarray analysis, a dataset of 28 cervical cancer cases and 23 normal cervix  
514 samples was utilised. Microarray data was obtained from GEO database accession  
515 number GSE9750.

516

### 517 **Statistical analysis**

518 Where indicated, data was analysed using a two-tailed, unpaired Student's t-test.

519

### 520 **Figure Legends**

521

522 **Figure 1. STAT3 phosphorylation is higher in HPV+ verses HPV- cervical cancer**  
523 **cells. A)** Representative western blot of from six cervical cancer cell lines – two HPV-  
524 (C33A and Dotc2 4510), two HPV16+ (SiHa and CaSKi) and HPV18+ (SW756 and  
525 HeLa) – for the expression of phosphorylated (Y705 and S727) and total STAT3.  
526 GAPDH served as a loading control. Data are representative of at least three biological  
527 independent repeats. **B)** Quantification of the protein band intensities in **A)**  
528 standardised to GAPDH levels. Bars represent the means  $\pm$  standard deviation from  
529 at 3 independent biological repeats. \*P<0.05 (Student's t-test).

530

531 **Figure 2. A secreted factor from HPV+ cervical cancer cells can induce STAT3**  
532 **phosphorylation in HPV- cervical cancer cells. A-B)** C33A cells were serum  
533 starved for 24 hours and conditioned media from **A)** HeLa or **B)** CaSKi cells was added  
534 for the indicated time points. For the control, C33A conditioned media was added to

535 cells for 2 hours (M in the figure). Represented western blot shows cell lysates  
536 analysed for the expression of phosphorylated and total STAT3. GAPDH served as a  
537 loading control. Data are representative of at least three biological independent  
538 repeats. **C-D)** C33A cells were serum starved for 24 hours and incubated with  
539 conditioned media from **C)** HeLa or **D)** CaSKi cells for 2 hours. For the control, C33A  
540 conditioned media was added to cells for 2 hours (M in the figure). Cells were analysed  
541 by immunofluorescence staining for total STAT3 (green) and counterstained with DAPI  
542 to highlight the nuclei (blue in the merged panels). Scale bar, 20  $\mu\text{m}$ .

543

544 **Figure 3. Interleukin-6 (IL-6) is up regulated in HPV+ cervical cancer cells. A)** The  
545 expression level of cytokines from the IL-6 family were analysed in HPV-, HPV16+  
546 and HPV18+ cervical cancer cells by qRT-PCR. Samples were normalized against U6  
547 mRNA levels. Representative data are presented relative to the HPV- cervical cancer  
548 cells. Bars are the means  $\pm$  standard deviation from at least three biological repeats.  
549 \* $P < 0.05$ , \*\* $P < 0.01$ , \*\*\* $P < 0.001$  (Student's t-test). **B)** The expression of IL-6 from six  
550 cervical cancer cell lines – two HPV- (C33A and Dotc2 4510), two HPV16+ (SiHa and  
551 CaSKi) and HPV18+ (SW756 and HeLa) – was analysed by qRT-PCR. Samples were  
552 normalized against U6 mRNA levels. Representative data are presented relative to  
553 the HPV- cervical cancer cells. Bars are the means  $\pm$  standard deviation from at least  
554 three biological repeats. \* $P < 0.05$ , \*\* $P < 0.01$ , \*\*\* $P < 0.001$  (Student's t-test). **C)**  
555 Representative western blot of from six cervical cancer cell lines – two HPV- (C33A  
556 and Dotc2 4510), two HPV16+ (SiHa and CaSKi) and HPV18+ (SW756 and HeLa) –  
557 for the expression of IL-6. GAPDH served as a loading control. Data are representative  
558 of at least three biological independent repeats. **D)** ELISA analysis from the culture  
559 medium from six cervical cancer cell lines – two HPV- (C33A and Dotc2 4510), two



560 HPV16+ (SiHa and CaSKi) and HPV18+ (SW756 and HeLa) – for secreted IL-6  
561 protein. Error bars represent the mean +/- standard deviation of a minimum of three  
562 biological repeats. ND = not determined (below the detection threshold). \*P<0.05,  
563 \*\*P<0.01, \*\*\*P<0.001 (Student's t-test).

564

565 **Figure 4. IL-6/gp130 signalling is required for STAT3 phosphorylation and**

566 **nuclear translocation in cervical cancer cells. A)** Representative western blot of

567 C33A cells treated with conditioned medium (CM) from HeLa and CaSKi cells for 2

568 hours. Cells were pre-treated with IgG, anti-IL6 or anti-gp130 antibody for 4 hours

569 before CM addition. Cell lysates were analysed for phosphorylated and total STAT3

570 expression. GAPDH served as a loading control. Data are representative of at least

571 three biological independent repeats. **B)** C33A cells treated with conditioned medium

572 (CM) from HeLa and CaSKi cells for 2 hours. Cells were pre-treated with IgG, anti-IL6

573 or anti-gp130 antibody for 4 hours before CM addition. Cells were then analysed by

574 immunofluorescence staining for total STAT3 (green) and counterstained with DAPI

575 to highlight the nuclei (blue in the merged panels). Scale bar, 20  $\mu$ m. **C)** HeLa cells

576 were treated with IgG, anti-IL6 or anti-gp130 for 4 hours. Cell lysates were analysed

577 for phosphorylated and total STAT3 expression. GAPDH served as a loading control.

578 Data are representative of at least three biological independent repeats. **D)** HeLa cells

579 were treated with IgG, anti-IL6 or anti-gp130 for 4 hours. Cells were then analysed by

580 immunofluorescence staining for total STAT3 (green) and counterstained with DAPI

581 to highlight the nuclei (blue in the merged panels). Scale bar, 20  $\mu$ m.

582

583 **Figure 5. HPV E6 induced IL-6 expression is required for STAT3**

584 **phosphorylation. A)** Representative luciferase reporter assay from C33A cells co-

585 transfected with GFP tagged E6 and an IL-6 promoter reporter. Promoter activity was  
586 measured using a dual-luciferase system. Data are presented as relative to the GFP  
587 transfected control. **B)** C33A cells were transiently transfected with GFP or GFP  
588 tagged HPV18 E6 and RNA was extracted for qRT-PCR analysis of IL-6 expression.  
589 Samples were normalized against U6 mRNA levels. Representative data are  
590 presented relative to the GFP control. **C)** Representative western blot of C33A cells  
591 transiently transfected with GFP or GFP tagged HPV18 E6 and analysed for IL-6  
592 expression. Expression of HPV E6 was confirmed using a GFP antibody and GAPDH  
593 served as a loading control. **D)** C33A cells were transiently transfected with GFP or  
594 GFP tagged HPV18 E6. The culture medium was analysed for IL-6 protein by ELISA.  
595 **E)** HeLa cells were transfected with a pool of two specific siRNAs against HPV18 E6  
596 and analysed for IL-6 mRNA expression by qRT-PCR. Samples were normalized  
597 against U6 mRNA levels. **F)** Representative western blot of HeLa cells transfected  
598 with a pool of two specific siRNAs against HPV18 E6 and analysed for the expression  
599 of IL-6. Knockdown of HPV18 E6 was confirmed using an antibody against HPV18 E6  
600 and p53. GAPDH served as a loading control. **G)** HeLa cells were transfected with a  
601 pool of two specific siRNAs against HPV18 E6. The culture medium was analysed for  
602 IL-6 protein by ELISA. **H)** Representative western blot of C33A cells transiently  
603 transfected with GFP or GFP tagged HPV18 E6 and treated with IgG, anti-IL6 or anti-  
604 gp130 for 4 hours before harvest. Cell lysates were then analysed for phosphorylated  
605 and total STAT3. Expression of HPV E6 was confirmed using a GFP antibody and  
606 GAPDH served as a loading control. Bars represent the means  $\pm$  standard deviation  
607 from at least three independent biological repeats. \*P<0.05, \*\*P<0.01 (Student's t-  
608 test).

609

610 **Figure 6. HPV E6 mediated IL-6 expression requires NF- $\kappa$ B activity. A)**

611 Representative luciferase reporter assay from C33A cells co-transfected with GFP  
612 tagged E6 and a ConA reporter containing tandem  $\kappa$ B binding sites. Promoter activity  
613 was measured using a dual-luciferase system. Data are presented as relative to the  
614 GFP transfected control. **B)** Representative western blot of C33A cells transiently  
615 transfected with GFP or GFP tagged HPV18 E6 and analysed for phosphorylated and  
616 total p65 expression. Expression of HPV E6 was confirmed using a GFP antibody and  
617 GAPDH served as a loading control. **C)** Representative western blot of HeLa cells  
618 transfected with a pool of two specific siRNAs against HPV18 E6 and analysed for the  
619 expression of phosphorylated and total p65. Knockdown of HPV18 E6 was confirmed  
620 using an antibody against HPV18 E6 and p53. GAPDH served as a loading control.  
621 **D-F)** C33A cells were co-transfected with GFP, GFP tagged HPV18 E6 or GFP tagged  
622 HPV18 E6 and mutant I $\kappa$ B $\alpha$  (I $\kappa$ Bm). Cells were then either left untreated or treated  
623 with IKK inhibitor VII (IKKi). **D)** Total RNA was extracted for qRT-PCR analysis of IL-6  
624 expression. Samples were normalized against U6 mRNA levels. Representative data  
625 are presented relative to the GFP control. **E)** Cell lysates were analysed for the  
626 expression of phosphorylated and total p65 and IL-6. Expression of HPV E6 was  
627 confirmed using a GFP antibody and GAPDH served as a loading control. **F)** The  
628 culture medium was analysed for IL-6 protein by ELISA. **G-I)** HeLa cells transfected  
629 with a pool of two specific siRNAs against HPV18 E6. **G)** Total RNA was extracted for  
630 qRT-PCR analysis of IL-6 expression. Samples were normalized against U6 mRNA  
631 levels. Representative data are presented relative to the GFP control. **H)** Cell lysates  
632 were analysed for the expression of phosphorylated and total p65 and IL-6. Expression  
633 of HPV E6 was confirmed using a GFP antibody and GAPDH served as a loading  
634 control. **I)** The culture medium was analysed for IL-6 protein by ELISA. Bars represent

635 the means  $\pm$  standard deviation from at least three independent biological repeats.

636 \*P<0.05, \*\*P<0.01, \*\*\*P<0.001 (Student's t-test).

637

638 **Figure 7. NF- $\kappa$ B activity is required for HPV E6 mediated STAT3 signalling. A)**

639 Representative western blot of C33A cells treated with 20 ng/mL recombinant human

640 TNF $\alpha$  for the indicated time points. Cell lysates were analysed for phosphorylated and

641 total p65, phosphorylated and total STAT3 and IL-6 expression. GAPDH served as a

642 loading control. Data are representative of at least three biological independent

643 repeats. **B)** C33A cells treated with 20 ng/mL recombinant human TNF $\alpha$  for 60 mins

644 were fixed and were analysed by immunofluorescence staining for total STAT3 (green)

645 and total p65 (red) and counterstained with DAPI to highlight the nuclei (blue in the

646 merged panels). Scale bar, 20  $\mu$ m. **C)** C33A cells were co-transfected with GFP, GFP

647 tagged HPV18 E6 or GFP tagged HPV18 E6 and mutant I $\kappa$ B $\alpha$  (I $\kappa$ Bm). Cells were then

648 either left untreated or treated with IKK inhibitor VII (IKKi). Cell lysates were then

649 analysed for phosphorylated and total p65, phosphorylated and total STAT3

650 expression. Expression of HPV E6 was confirmed using a GFP antibody and GAPDH

651 served as a loading control. **D)** Representative western blot from HeLa cells treated

652 with increasing doses of the IKK $\alpha$ / $\beta$  inhibitor IKK inhibitor VII (IKKi). Cell lysates were

653 analysed for the expression of phosphorylated and total p65, phosphorylated and total

654 STAT3 and IL-6 expression. GAPDH served as a loading control. **E)** Representative

655 western blot from HeLa cells transfected with mutant I $\kappa$ B $\alpha$  (I $\kappa$ Bm). Cell lysates were

656 analysed as in **D)**. **F)** C33A cells were serum starved for 24 hours. Cells were then

657 treated with HeLa condition media from HeLa cells treated with DMSO or IKKi or

658 transfected with pcDNA or I $\kappa$ Bm. Cell lysates were analysed for phosphorylated and

659 total STAT3 expression. GAPDH served as a loading control. **G)** C33A cells were

660 serum starved for 24 hours. Cells were then treated with HeLa condition media from  
661 HeLa cells treated with DMSO or IKKi or transfected with pcDNA or I $\kappa$ Bm. Cells were  
662 analysed by immunofluorescence staining for total STAT3 (green) and counterstained  
663 with DAPI to highlight the nuclei (blue in the merged panels). Scale bar, 20  $\mu$ m.

664

665 **Figure 8. Activation of Akt by HPV E6 contributes to IL-6 expression via NF- $\kappa$ B.**

666 **A)** Representative western blot of C33A cells transiently transfected with GFP or GFP  
667 tagged HPV18 E6 and analysed for phosphorylated and total Akt expression.

668 Expression of HPV E6 was confirmed using a GFP antibody and GAPDH served as a  
669 loading control. **B)** Representative western blot of HeLa cells transfected with a pool

670 of two specific siRNAs against HPV18 E6 and analysed for the expression of  
671 phosphorylated and total Akt. Knockdown of HPV18 E6 was confirmed using an

672 antibody against HPV18 E6 and p53. GAPDH served as a loading control. **C-E)** C33A  
673 cells were co-transfected with GFP, GFP tagged HPV18 E6 or GFP tagged HPV18

674 E6 and mutant Akt (Akt-DN). Cells were then either left untreated or treated with Akt  
675 inhibitor VIII (Akti). **C)** Total RNA was extracted for qRT-PCR analysis of IL-6

676 expression. Samples were normalized against U6 mRNA levels. Representative data  
677 are presented relative to the GFP control. **D)** Cell lysates were analysed for the

678 expression of phosphorylated and total p65 and IL-6. Expression of HPV E6 was  
679 confirmed using a GFP antibody and GAPDH served as a loading control. **E)** The

680 culture medium was analysed for IL-6 protein by ELISA **F-H)** HeLa and CaSki cells  
681 transfected with Akt-DN or treated with Akti. **F)** Total RNA was extracted for qRT-PCR

682 analysis of IL-6 expression. Samples were normalized against U6 mRNA levels.  
683 Representative data are presented relative to the GFP control. **G)** Cell lysates were

684 analysed for the expression of phosphorylated and total p65 and IL-6. Expression of

685 HPV E6 was confirmed using a GFP antibody and GAPDH served as a loading control.

686 **H)** The culture medium was analysed for IL-6 protein by ELISA. Bars represent the

687 means  $\pm$  standard deviation from at least three independent biological repeats.

688 \*P<0.05, \*\*P<0.01, \*\*\*P<0.001 (Student's t-test).

689

690 **Figure 9. IL-6 expression correlates with cervical disease progression and is up**

691 **regulated in cervical cancer. A)** Scatter dot plot of qRT-PCR analysis of RNA

692 extracted from a panel of cytology samples of CIN lesions of increasing grade. Five

693 samples from each clinical grade (neg, CIN I-III) were analysed and mRNA levels were

694 normalized to neg samples. Samples were normalized against U6 mRNA levels.

695 Representative data are presented relative to the HPV- cervical cancer cells. Bars are

696 the means  $\pm$  standard deviation from at least three biological repeats. \*P<0.05,

697 \*\*P<0.01, \*\*\*P<0.001 (Student's t-test). **B)** Representative western blots from cytology

698 samples of CIN lesions of increasing grade analysed IL-6 expression. GAPDH served

699 as a loading control. **C)** Scatter dot plot of densitometry analysis of a panel of cytology

700 samples. Twenty samples from each clinical grade (neg, CIN I-III) were analysed by

701 western blot and densitometry analysis was performed using ImageJ. GAPDH was

702 used as a loading control. **D)** Scatter dot plot of data acquired from the dataset

703 GSE9750 on the GEO database. Arbitrary values for the mRNA expression of IL-6 in

704 normal cervix (n=23) and cervical cancer (n=28) samples were plotted. Error bars

705 represent the mean  $\pm$  standard deviation of a minimum of three biological repeats.

706 \*P<0.05, \*\*P<0.01, \*\*\*P<0.001 (Student's t-test).

707

708 **Figure 10. E6 activates an NF $\kappa$ B mediated STAT3 pathway in HPV+ cervical**  
709 **cancer.** Schematic diagram of E6 mediated STAT3 signalling in HPV+ cervical cancer  
710 cells.

711

712 **Supplementary Figure 1. HPV16 E6 induces IL-6 expression. A)** CaSKi cells were  
713 transfected with HPV16 E6 specific siRNA and analysed for IL-6 mRNA expression by  
714 qRT-PCR. Samples were normalized against U6 mRNA levels. **B)** Representative  
715 western blot of CaSKi cells transfected with a pool of two specific siRNAs against  
716 HPV16 E6 and analysed for the expression of IL-6. Knockdown of HPV16 E6 was  
717 confirmed using an antibody against HPV16 E6 and p53. GAPDH served as a loading  
718 control. **G)** CaSKi cells were transfected with a pool of two specific siRNAs against  
719 HPV16 E6. The culture medium was analysed for IL-6 protein by ELISA. Data are  
720 representative of at least three biological independent repeats. Error bars represent  
721 the mean +/- standard deviation of a minimum of three biological repeats. \*P<0.05,  
722 \*\*P<0.01, \*\*\*P<0.001 (Student's t-test).

723

724 **Supplementary Figure 2. NF- $\kappa$ B inhibition does not affect exogenous IL-6**  
725 **mediated STAT3 signalling. A)** C33A were treated with DMSO or IKKi or transfected  
726 with pcDNA or I $\kappa$ Bm before treatment with 20 ng/mL recombinant human IL-6 for 30  
727 mins. Cell lysates were analysed for the phosphorylated and total forms of p65 and  
728 STAT3. GAPDH served as a loading control. Data are representative of at least three  
729 biological independent repeats. **B)** C33A were treated with DMSO or IKKi or  
730 transfected with pcDNA or I $\kappa$ Bm before treatment with 20 ng/mL recombinant human  
731 IL-6 for 30 mins. Cells were analysed by immunofluorescence staining for total STAT3

732 (green) and counterstained with DAPI to highlight the nuclei (blue in the merged  
733 panels). Scale bar, 20  $\mu\text{m}$

734

## 735 **Acknowledgements**

736 We are grateful to William Sellers for providing the retroviral Akt expression vectors  
737 through the Addgene repository. We thank the Scottish HPV Investigators Network  
738 (SHINE) and Sheila Graham (University of Glasgow) for providing HPV positive biopsy  
739 samples. Martin Stacey (University of Leeds) provided help and reagents for ELISA  
740 experiments, Derek Mann (University of Newcastle) and Ron Hay (University of  
741 Dundee) provided plasmid reagents. Stephen Griffin (University of Leeds) and  
742 Matthew Reeves (University College London) provided helpful discussions.

743

## 744 **Author contributions**

745 Conceived and designed the experiments: ELM and AM. Performed the experiments:  
746 ELM. Wrote the manuscript: ELM and AM. Critically analysed the manuscript: ELM  
747 and AM.

748



749 **References**

- 750 1. Hausen zur H. Papillomaviruses and cancer: from basic studies to clinical  
751 application. *Nat Rev Cancer*. 2002;2: 342–350. doi:10.1038/nrc798
- 752 2. Crosbie EJ, Einstein MH, Franceschi S, Kitchener HC. Human papillomavirus  
753 and cervical cancer. *Lancet*. 2013;382: 889–899. doi:10.1016/S0140-  
754 6736(13)60022-7
- 755 3. Wasson CW, Morgan EL, Müller M, Ross RL, Hartley M, Roberts S, et al. Human  
756 papillomavirus type 18 E5 oncogene supports cell cycle progression and impairs  
757 epithelial differentiation by modulating growth factor receptor signalling during  
758 the virus life cycle. *Oncotarget*. Impact Journals LLC; 2017;8: 103581–103600.  
759 doi:10.18632/oncotarget.21658
- 760 4. Zhang B, Srirangam A, Potter DA, Roman A. HPV16 E5 protein disrupts the c-  
761 Cbl-EGFR interaction and EGFR ubiquitination in human foreskin keratinocytes.  
762 *Oncogene*. Nature Publishing Group; 2005;24: 2585–2588.  
763 doi:10.1038/sj.onc.1208453
- 764 5. Shostak K, Zhang X, Hubert P, Göktuna SI, Jiang Z, Klevernic I, et al. NF- $\kappa$ B-  
765 induced KIAA1199 promotes survival through EGFR signalling. *Nat Commun*.  
766 Nature Publishing Group; 2014;5: 5232. doi:10.1038/ncomms6232
- 767 6. Hu T, Li C. Convergence between Wnt- $\beta$ -catenin and EGFR signaling in cancer.  
768 *Mol Cancer*. BioMed Central; 2010;9: 236. doi:10.1186/1476-4598-9-236
- 769 7. Bello JOM, Nieva LO, Paredes AC, Gonzalez AMF, Zavaleta LR, Lizano M.  
770 Regulation of the Wnt/ $\beta$ -Catenin Signaling Pathway by Human Papillomavirus

- 771 E6 and E7 Oncoproteins. *Viruses*. Multidisciplinary Digital Publishing Institute;  
772 2015;7: 4734–4755. doi:10.3390/v7082842
- 773 8. He C, Mao D, Hua G, Lv X, Chen X, Angeletti PC, et al. The Hippo/YAP pathway  
774 interacts with EGFR signaling and HPV oncoproteins to regulate cervical cancer  
775 progression. *EMBO Mol Med*. EMBO Press; 2015;7: 1426–1449.  
776 doi:10.15252/emmm.201404976
- 777 9. Rodríguez MI, Finbow ME, Alonso A. Binding of human papillomavirus 16 E5 to  
778 the 16 kDa subunit c (proteolipid) of the vacuolar H<sup>+</sup>-ATPase can be dissociated  
779 from the E5-mediated epidermal growth factor receptor overactivation.  
780 *Oncogene*. Nature Publishing Group; 2000;19: 3727–3732.  
781 doi:10.1038/sj.onc.1203718
- 782 10. Wetherill LF, Holmes KK, Verow M, Müller M, Howell G, Harris M, et al. High-  
783 risk human papillomavirus E5 oncoprotein displays channel-forming activity  
784 sensitive to small-molecule inhibitors. *J Virol*. American Society for Microbiology;  
785 2012;86: 5341–5351. doi:10.1128/JVI.06243-11
- 786 11. Wetherill LF, Wasson CW, Swinscoe G, Kealy D, Foster R, Griffin S, et al. Alkyl-  
787 imino sugars inhibit the pro-oncogenic ion channel function of human  
788 papillomavirus (HPV) E5. *Antiviral Res*. 2018;158: 113–121.  
789 doi:10.1016/j.antiviral.2018.08.005
- 790 12. Scheffner M, Huibregtse JM, Vierstra RD, Howley PM. The HPV-16 E6 and E6-  
791 AP complex functions as a ubiquitin-protein ligase in the ubiquitination of p53.  
792 *Cell*. 1993;75: 495–505.

- 793 13. Banerjee NS, Wang H-K, Broker TR, Chow LT. Human papillomavirus (HPV)  
794 E7 induces prolonged G2 following S phase reentry in differentiated human  
795 keratinocytes. *J Biol Chem.* 2011;286: 15473–15482.  
796 doi:10.1074/jbc.M110.197574
- 797 14. Moody CA, Laimins LA. Human papillomaviruses activate the ATM DNA  
798 damage pathway for viral genome amplification upon differentiation. Galloway  
799 D, editor. *PLoS Pathog.* Public Library of Science; 2009;5: e1000605.  
800 doi:10.1371/journal.ppat.1000605
- 801 15. Yu H, Lee H, Herrmann A, Buettner R, Jove R. Revisiting STAT3 signalling in  
802 cancer: new and unexpected biological functions. *Nat Rev Cancer.* 2014;14:  
803 736–746. doi:10.1038/nrc3818
- 804 16. Carpenter RL, Lo H-W. STAT3 Target Genes Relevant to Human Cancers.  
805 *Cancers (Basel).* Multidisciplinary Digital Publishing Institute; 2014;6: 897–925.  
806 doi:10.3390/cancers6020897
- 807 17. Johnson DE, O'Keefe RA, Grandis JR. Targeting the IL-6/JAK/STAT3 signalling  
808 axis in cancer. *Nat Rev Clin Oncol.* Nature Publishing Group; 2018;15: 234–  
809 248. doi:10.1038/nrclinonc.2018.8
- 810 18. Roca Suarez AA, Van Renne N, Baumert TF, Lupberger J. Viral manipulation of  
811 STAT3: Evade, exploit, and injure. Hobman TC, editor. *PLoS Pathog.* 2018;14:  
812 e1006839. doi:10.1371/journal.ppat.1006839
- 813 19. Morgan EL, Wasson CW, Hanson L, Kealy D, Pentland I, McGuire V, et al.  
814 STAT3 activation by E6 is essential for the differentiation-dependent HPV18 life

- 815 cycle. Galloway DA, editor. PLoS Pathog. 2018;14: e1006975.  
816 doi:10.1371/journal.ppat.1006975
- 817 20. Shukla S, Mahata S, Shishodia G, Pandey A, Tyagi A, Vishnoi K, et al.  
818 Functional regulatory role of STAT3 in HPV16-mediated cervical  
819 carcinogenesis. Williams BO, editor. PLoS ONE. Public Library of Science;  
820 2013;8: e67849. doi:10.1371/journal.pone.0067849
- 821 21. Shukla S, Shishodia G, Mahata S, Hedau S, Pandey A, Bhambhani S, et al.  
822 Aberrant expression and constitutive activation of STAT3 in cervical  
823 carcinogenesis: implications in high-risk human papillomavirus infection. Mol  
824 Cancer. BioMed Central; 2010;9: 282. doi:10.1186/1476-4598-9-282
- 825 22. Silver JS, Hunter CA. gp130 at the nexus of inflammation, autoimmunity, and  
826 cancer. J Leukoc Biol. 2010;88: 1145–1156. doi:10.1189/jlb.0410217
- 827 23. Yu H, Pardoll D, Jove R. STATs in cancer inflammation and immunity: a leading  
828 role for STAT3. Nat Rev Cancer. 2009;9: 798–809. doi:10.1038/nrc2734
- 829 24. Cheng Y-W, Lee H, Shiau M-Y, Wu T-C, Huang T-T, Chang Y-H. Human  
830 papillomavirus type 16/18 up-regulates the expression of interleukin-6 and  
831 antiapoptotic Mcl-1 in non-small cell lung cancer. Clin Cancer Res. 2008;14:  
832 4705–4712. doi:10.1158/1078-0432.CCR-07-4675
- 833 25. Hinz M, Scheidereit C. The I $\kappa$ B kinase complex in NF- $\kappa$ B regulation and beyond.  
834 EMBO Rep. 2014;15: 46–61. doi:10.1002/embr.201337983
- 835 26. James MA, Lee JH, Klingelutz AJ. Human papillomavirus type 16 E6 activates  
836 NF- $\kappa$ B, induces cIAP-2 expression, and protects against apoptosis in a

- 837 PDZ binding motif-dependent manner. *J Virol.* 2006;80: 5301–5307.  
838 doi:10.1128/JVI.01942-05
- 839 27. An J, Mo D, Liu H, Veena MS, Srivatsan ES, Massoumi R, et al. Inactivation of  
840 the CYLD deubiquitinase by HPV E6 mediates hypoxia-induced NF-kappaB  
841 activation. *Cancer Cell.* 2008;14: 394–407. doi:10.1016/j.ccr.2008.10.007
- 842 28. Kroll M, Margottin F, Kohl A, Renard P, Durand H, Concordet JP, et al. Inducible  
843 degradation of I kappa B alpha by the proteasome requires interaction with the F-  
844 box protein h-betaTrCP. *J Biol Chem.* 1999;274: 7941–7945.
- 845 29. Zhang Q, Lenardo MJ, Baltimore D. 30 Years of NF-kB: A Blossoming of  
846 Relevance to Human Pathobiology. *Cell.* 2017;168: 37–57.  
847 doi:10.1016/j.cell.2016.12.012
- 848 30. Litwin TR, Clarke MA, Dean M, Wentzensen N. Somatic Host Cell Alterations in  
849 HPV Carcinogenesis. *Viruses.* Multidisciplinary Digital Publishing Institute;  
850 2017;9: 206. doi:10.3390/v9080206
- 851 31. Hussain AR, Ahmed SO, Ahmed M, Khan OS, Abdulmohsen AI S, Plataniias LC,  
852 et al. Cross-talk between NFkB and the PI3-kinase/AKT pathway can be  
853 targeted in primary effusion lymphoma (PEL) cell lines for efficient apoptosis.  
854 Gallyas F, editor. *PLoS ONE.* Public Library of Science; 2012;7: e39945.  
855 doi:10.1371/journal.pone.0039945
- 856 32. Ahmad A, Biersack B, Li Y, Kong D, Bao B, Schobert R, et al. Targeted  
857 regulation of PI3K/Akt/mTOR/NF-kB signaling by indole compounds and their  
858 derivatives: mechanistic details and biological implications for cancer therapy.  
859 *Anticancer Agents Med Chem.* NIH Public Access; 2013;13: 1002–1013.

- 860 33. Cahill CM, Rogers JT. Interleukin (IL) 1beta induction of IL-6 is mediated by a  
861 novel phosphatidylinositol 3-kinase-dependent AKT/IkappaB kinase alpha  
862 pathway targeting activator protein-1. *J Biol Chem.* 2008;283: 25900–25912.  
863 doi:10.1074/jbc.M707692200
- 864 34. Spangle JM, Münger K. The human papillomavirus type 16 E6 oncoprotein  
865 activates mTORC1 signaling and increases protein synthesis. *J Virol.* 2010;84:  
866 9398–9407. doi:10.1128/JVI.00974-10
- 867 35. Zhao Z, Leister WH, Robinson RG, Barnett SF, Defeo-Jones D, Jones RE, et  
868 al. Discovery of 2,3,5-trisubstituted pyridine derivatives as potent Akt1 and Akt2  
869 dual inhibitors. *Bioorg Med Chem Lett.* 2005;15: 905–909.  
870 doi:10.1016/j.bmcl.2004.12.062
- 871 36. Street A, Macdonald A, McCormick C, Harris M. Hepatitis C virus NS5A-  
872 mediated activation of phosphoinositide 3-kinase results in stabilization of  
873 cellular beta-catenin and stimulation of beta-catenin-responsive transcription. *J*  
874 *Virol. American Society for Microbiology Journals;* 2005;79: 5006–5016.  
875 doi:10.1128/JVI.79.8.5006-5016.2005
- 876 37. Kang S, Bader AG, Vogt PK. Phosphatidylinositol 3-kinase mutations identified  
877 in human cancer are oncogenic. *Proc Natl Acad Sci USA.* 2005;102: 802–807.  
878 doi:10.1073/pnas.0408864102
- 879 38. Yadav A, Kumar B, Datta J, Teknos TN, Kumar P. IL-6 promotes head and neck  
880 tumor metastasis by inducing epithelial-mesenchymal transition via the JAK-  
881 STAT3-SNAIL signaling pathway. *Mol Cancer Res.* 2011;9: 1658–1667.  
882 doi:10.1158/1541-7786.MCR-11-0271

- 883 39. Sriuranpong V, Park JI, Amornphimoltham P, Patel V, Nelkin BD, Gutkind JS.  
884 Epidermal growth factor receptor-independent constitutive activation of STAT3  
885 in head and neck squamous cell carcinoma is mediated by the  
886 autocrine/paracrine stimulation of the interleukin 6/gp130 cytokine system.  
887 *Cancer Res.* 2003;63: 2948–2956.
- 888 40. Fisher DT, Appenheimer MM, Evans SS. The two faces of IL-6 in the tumor  
889 microenvironment. *Semin Immunol.* 2014;26: 38–47.  
890 doi:10.1016/j.smim.2014.01.008
- 891 41. Gao J, Zhao S, Halstensen TS. Increased interleukin-6 expression is associated  
892 with poor prognosis and acquired cisplatin resistance in head and neck  
893 squamous cell carcinoma. *Oncol Rep. Spandidos Publications;* 2016;35: 3265–  
894 3274. doi:10.3892/or.2016.4765
- 895 42. Stanam A, Love-Homan L, Joseph TS, Espinosa-Cotton M, Simons AL.  
896 Upregulated interleukin-6 expression contributes to erlotinib resistance in head  
897 and neck squamous cell carcinoma. *Mol Oncol.* 2015;9: 1371–1383.  
898 doi:10.1016/j.molonc.2015.03.008
- 899 43. Stabile LP, Egloff AM, Gibson MK, Gooding WE, Ohr J, Zhou P, et al. IL6 is  
900 associated with response to dasatinib and cetuximab: Phase II clinical trial with  
901 mechanistic correlatives in cetuximab-resistant head and neck cancer. *Oral*  
902 *Oncol.* 2017;69: 38–45. doi:10.1016/j.oraloncology.2017.03.011
- 903 44. Chen M, Sun F, Han L, Qu Z. Kaposi's sarcoma herpesvirus (KSHV) microRNA  
904 K12-1 functions as an oncogene by activating NF- $\kappa$ B/IL-6/STAT3 signaling.

- 905 Oncotarget. Impact Journals; 2016;7: 33363–33373.  
906 doi:10.18632/oncotarget.9221
- 907 45. Tacke RS, Tosello-Trampont A, Nguyen V, Mullins DW, Hahn YS. Extracellular  
908 hepatitis C virus core protein activates STAT3 in human  
909 monocytes/macrophages/dendritic cells via an IL-6 autocrine pathway. J Biol  
910 Chem. American Society for Biochemistry and Molecular Biology; 2011;286:  
911 10847–10855. doi:10.1074/jbc.M110.217653
- 912 46. Slinger E, Maussang D, Schreiber A, Siderius M, Rahbar A, Fraile-Ramos A, et  
913 al. HCMV-encoded chemokine receptor US28 mediates proliferative signaling  
914 through the IL-6-STAT3 axis. Sci Signal. 2010;3: ra58–ra58.  
915 doi:10.1126/scisignal.2001180
- 916 47. Wei L-H, Kuo M-L, Chen C-A, Chou C-H, Lai K-B, Lee C-N, et al. Interleukin-6  
917 promotes cervical tumor growth by VEGF-dependent angiogenesis via a STAT3  
918 pathway. Oncogene. Nature Publishing Group; 2003;22: 1517–1527.  
919 doi:10.1038/sj.onc.1206226
- 920 48. Song Z, Lin Y, Ye X, Feng C, Lu Y, Yang G, et al. Expression of IL-1 $\alpha$  and IL-6  
921 is Associated with Progression and Prognosis of Human Cervical Cancer. Med  
922 Sci Monit. International Scientific Information, Inc; 2016;22: 4475–4481.  
923 doi:10.12659/MSM.898569
- 924 49. Knudsen SLJ, Mac ASW, Henriksen L, van Deurs B, Grøvdal LM. EGFR  
925 signaling patterns are regulated by its different ligands. Growth Factors. Taylor  
926 & Francis; 2014;32: 155–163. doi:10.3109/08977194.2014.952410



- 927 50. Karin M. NF-kappaB as a critical link between inflammation and cancer. Cold  
928 Spring Harb Perspect Biol. 2009;1: a000141–a000141.  
929 doi:10.1101/cshperspect.a000141
- 930 51. Janakiram NB, Rao CV. The role of inflammation in colon cancer. Adv Exp Med  
931 Biol. Basel: Springer Basel; 2014;816: 25–52. doi:10.1007/978-3-0348-0837-  
932 8\_2
- 933 52. Polk DB, Peek RM. Helicobacter pylori: gastric cancer and beyond. Nat Rev  
934 Cancer. Nature Publishing Group; 2010;10: 403–414. doi:10.1038/nrc2857
- 935 53. Zhang X-Y, Zhang P-Y, Aboul-Soud MAM. From inflammation to gastric cancer:  
936 Role of Helicobacter pylori. Oncol Lett. Spandidos Publications; 2017;13: 543–  
937 548. doi:10.3892/ol.2016.5506
- 938 54. Castello G, Scala S, Palmieri G, Curley SA, Izzo F. HCV-related hepatocellular  
939 carcinoma: From chronic inflammation to cancer. Clin Immunol. 2010;134: 237–  
940 250. doi:10.1016/j.clim.2009.10.007
- 941 55. Castle PE, Hillier SL, Rabe LK, Hildesheim A, Herrero R, Bratti MC, et al. An  
942 association of cervical inflammation with high-grade cervical neoplasia in  
943 women infected with oncogenic human papillomavirus (HPV). Cancer Epidemiol  
944 Biomarkers Prev. 2001;10: 1021–1027.
- 945 56. Fernandes JV, DE Medeiros Fernandes TAA, DE Azevedo JCV, Cobucci RNO,  
946 DE Carvalho MGF, Andrade VS, et al. Link between chronic inflammation and  
947 human papillomavirus-induced carcinogenesis (Review). Oncol Lett. 2015;9:  
948 1015–1026. doi:10.3892/ol.2015.2884

- 949 57. Subbaramaiah K, Dannenberg AJ. Cyclooxygenase-2 transcription is regulated  
950 by human papillomavirus 16 E6 and E7 oncoproteins: evidence of a  
951 corepressor/coactivator exchange. *Cancer Res.* 2007;67: 3976–3985.  
952 doi:10.1158/0008-5472.CAN-06-4273
- 953 58. Hasan U. Human papillomavirus (HPV) deregulation of Toll-like receptor 9.  
954 *Oncoimmunology.* Taylor & Francis; 2014;3: e27257. doi:10.4161/onci.27257
- 955 59. Ma W, Tummers B, van Esch EMG, Goedemans R, Melief CJM, Meyers C, et  
956 al. Human Papillomavirus Downregulates the Expression of IFITM1 and RIPK3  
957 to Escape from IFN $\gamma$ - and TNF $\alpha$ -Mediated Antiproliferative Effects and  
958 Necroptosis. *Front Immunol.* 2016;7: 496. doi:10.3389/fimmu.2016.00496
- 959 60. Nees M, Geoghegan JM, Hyman T, Frank S, Miller L, Woodworth CD.  
960 Papillomavirus type 16 oncogenes downregulate expression of interferon-  
961 responsive genes and upregulate proliferation-associated and NF-kappaB-  
962 responsive genes in cervical keratinocytes. *J Virol.* 2001;75: 4283–4296.  
963 doi:10.1128/JVI.75.9.4283-4296.2001
- 964 61. Vandermark ER, Deluca KA, Gardner CR, Marker DF, Schreiner CN, Strickland  
965 DA, et al. Human papillomavirus type 16 E6 and E 7 proteins alter NF-kB in  
966 cultured cervical epithelial cells and inhibition of NF-kB promotes cell growth and  
967 immortalization. *Virology.* 2012;425: 53–60. doi:10.1016/j.virol.2011.12.023
- 968 62. Dan HC, Cooper MJ, Cogswell PC, Duncan JA, Ting JP-Y, Baldwin AS. Akt-  
969 dependent regulation of NF- $\kappa$ B is controlled by mTOR and Raptor in  
970 association with IKK. *Genes Dev.* Cold Spring Harbor Lab; 2008;22: 1490–1500.  
971 doi:10.1101/gad.1662308

- 972 63. Bai D, Ueno L, Vogt PK. Akt-mediated regulation of NFkappaB and the  
973 essentialness of NFkappaB for the oncogenicity of PI3K and Akt. *Int J Cancer*.  
974 John Wiley & Sons, Ltd; 2009;125: 2863–2870. doi:10.1002/ijc.24748
- 975 64. Bader AG, Kang S, Vogt PK. Cancer-specific mutations in PIK3CA are  
976 oncogenic in vivo. *Proc Natl Acad Sci USA*. 2006;103: 1475–1479.  
977 doi:10.1073/pnas.0510857103
- 978 65. Hutti JE, Pfefferle AD, Russell SC, Sircar M, Perou CM, Baldwin AS. Oncogenic  
979 PI3K mutations lead to NF-κB-dependent cytokine expression following growth  
980 factor deprivation. *Cancer Res*. American Association for Cancer Research;  
981 2012;72: 3260–3269. doi:10.1158/0008-5472.CAN-11-4141
- 982 66. Arjumand W, Merry CD, Wang C, Saba E, McIntyre JB, Fang S, et al.  
983 Phosphatidyl inositol-3 kinase (PIK3CA) E545K mutation confers cisplatin  
984 resistance and a migratory phenotype in cervical cancer cells. *Oncotarget*.  
985 2016;7: 82424–82439. doi:10.18632/oncotarget.10955
- 986 67. Massacesi C, Di Tomaso E, Urban P, Germa C, Quadt C, Trandafir L, et al. PI3K  
987 inhibitors as new cancer therapeutics: implications for clinical trial design. *Onco*  
988 *Targets Ther*. Dove Press; 2016;9: 203–210. doi:10.2147/OTT.S89967
- 989 68. Macdonald A, Crowder K, Street A, McCormick C, Saksela K, Harris M. The  
990 hepatitis C virus non-structural NS5A protein inhibits activating protein-1  
991 function by perturbing ras-ERK pathway signaling. *J Biol Chem*. 2003;278:  
992 17775–17784. doi:10.1074/jbc.M210900200
- 993 69. Richards KH, Wasson CW, Watherston O, Doble R, Blair GE, Wittmann M, et  
994 al. The human papillomavirus (HPV) E7 protein antagonises an Imiquimod-

- 995 induced inflammatory pathway in primary human keratinocytes. *Sci Rep. Nature*  
996 Publishing Group; 2015;5: 12922. doi:10.1038/srep12922
- 997 70. Livak KJ, Schmittgen TD. Analysis of relative gene expression data using real-  
998 time quantitative PCR and the 2(-Delta Delta C(T)) Method. *Methods*. 2001;25:  
999 402–408. doi:10.1006/meth.2001.1262
- 1000 71. Griffiths DA, Abdul-Sada H, Knight LM, Jackson BR, Richards K, Prescott EL,  
1001 et al. Merkel cell polyomavirus small T antigen targets the NEMO adaptor protein  
1002 to disrupt inflammatory signaling. *J Virol*. 2013;87: 13853–13867.  
1003 doi:10.1128/JVI.02159-13
- 1004 72. Macdonald A, Mazaleyrat S, McCormick C, Street A, Burgoyne NJ, Jackson RM,  
1005 et al. Further studies on hepatitis C virus NS5A-SH3 domain interactions:  
1006 identification of residues critical for binding and implications for viral RNA  
1007 replication and modulation of cell signalling. *J Gen Virol. Microbiology Society*;  
1008 2005;86: 1035–1044. doi:10.1099/vir.0.80734-0
- 1009

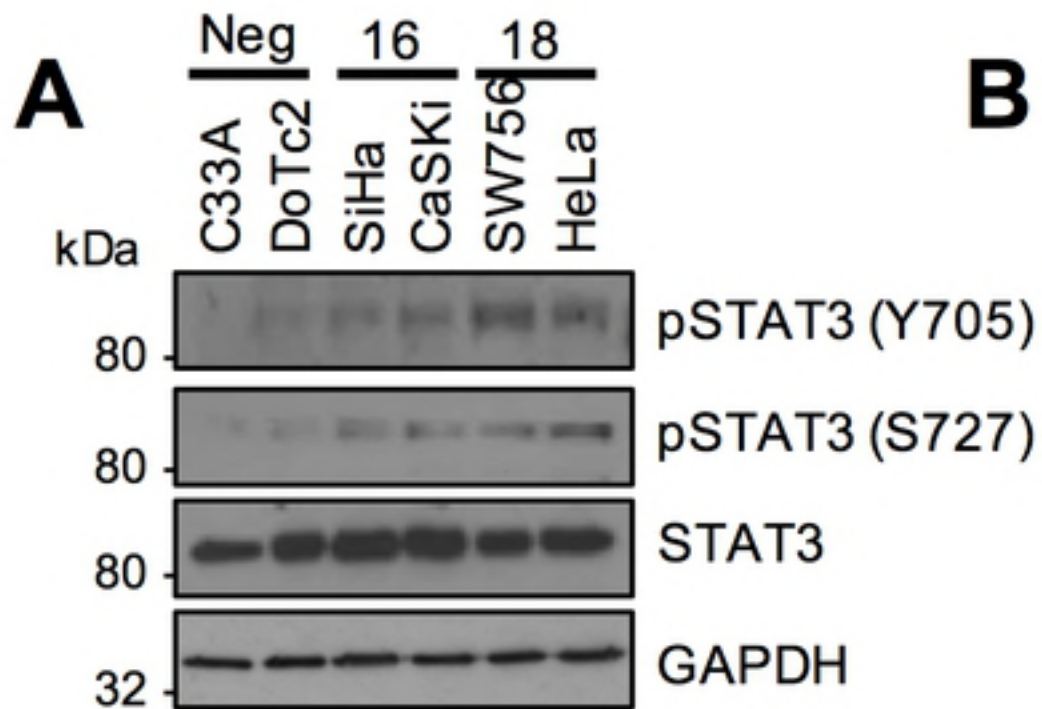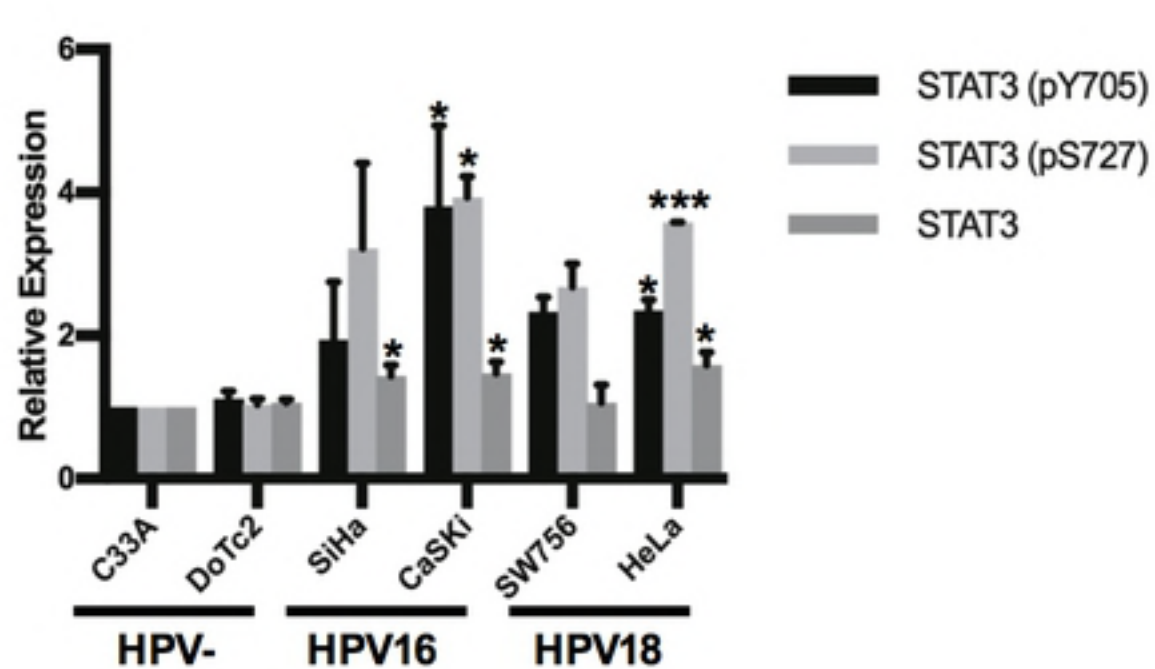

Figure

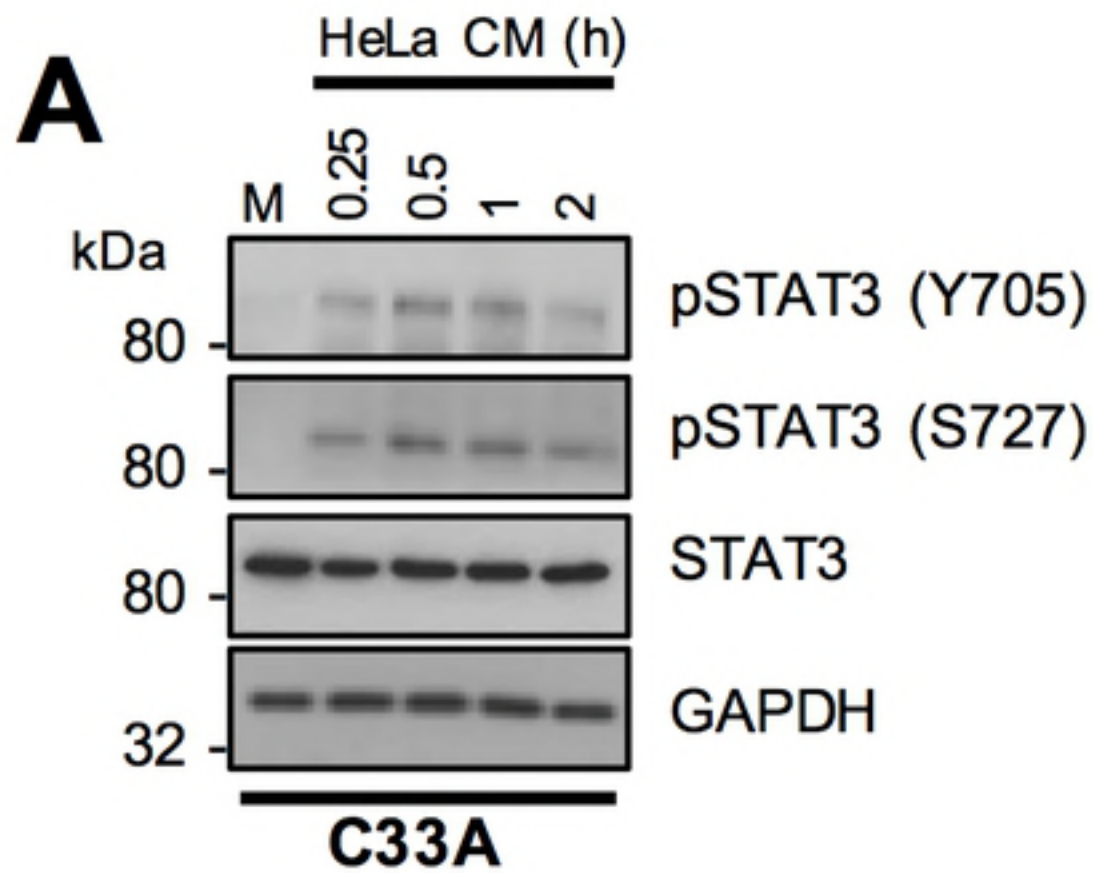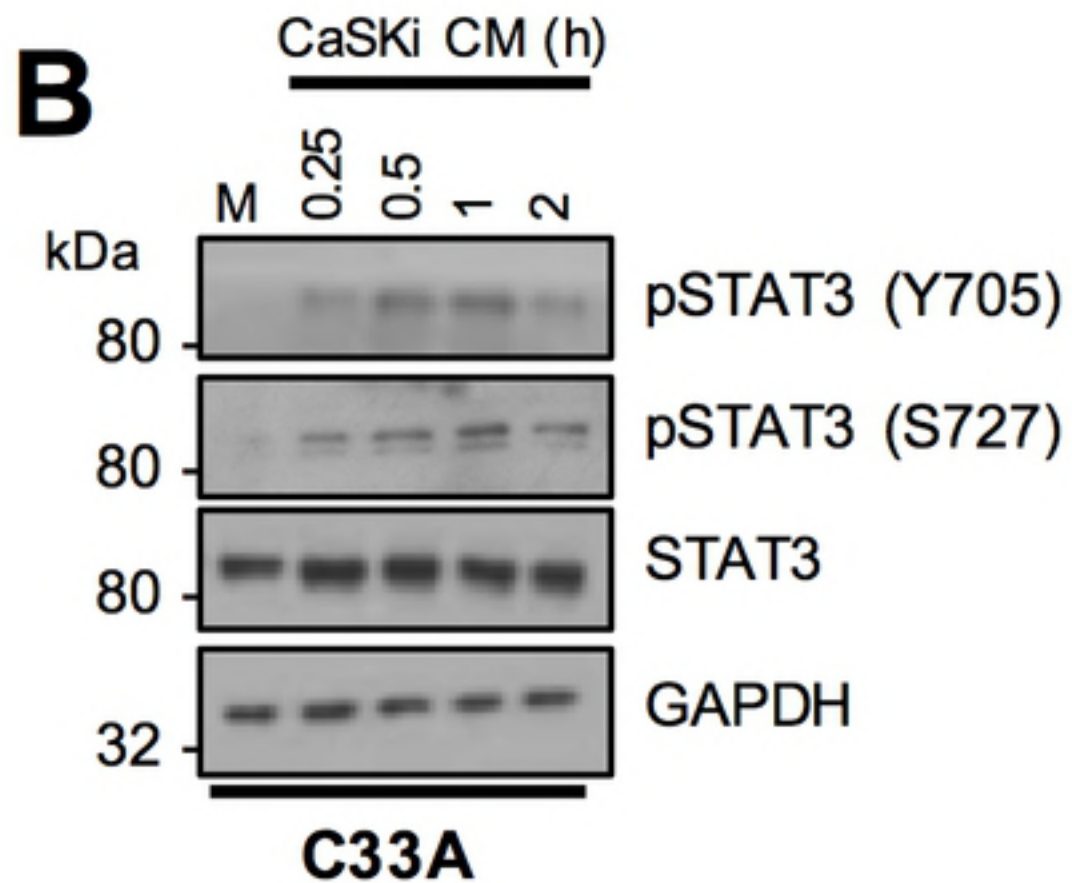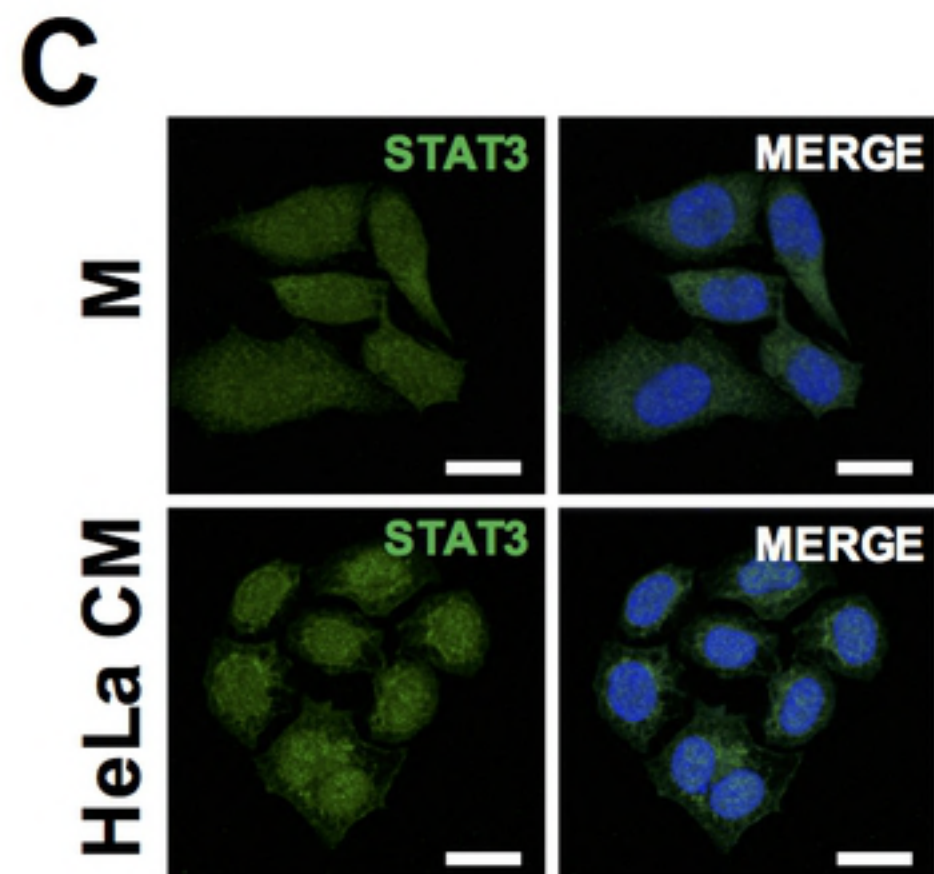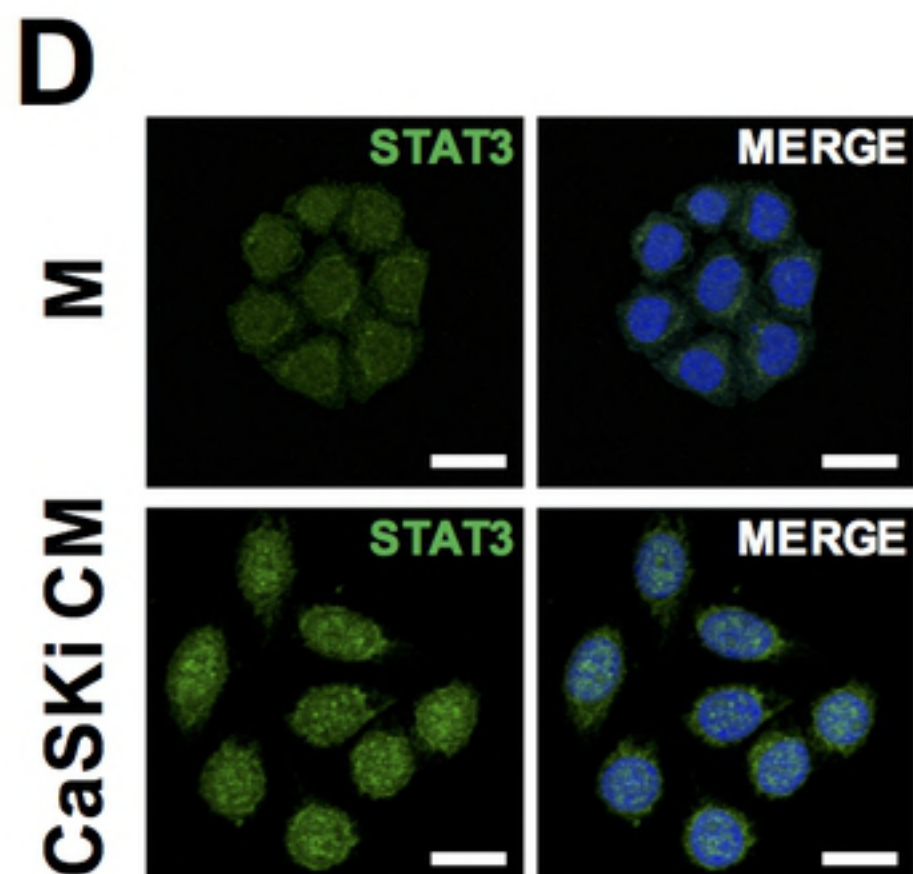

Figure

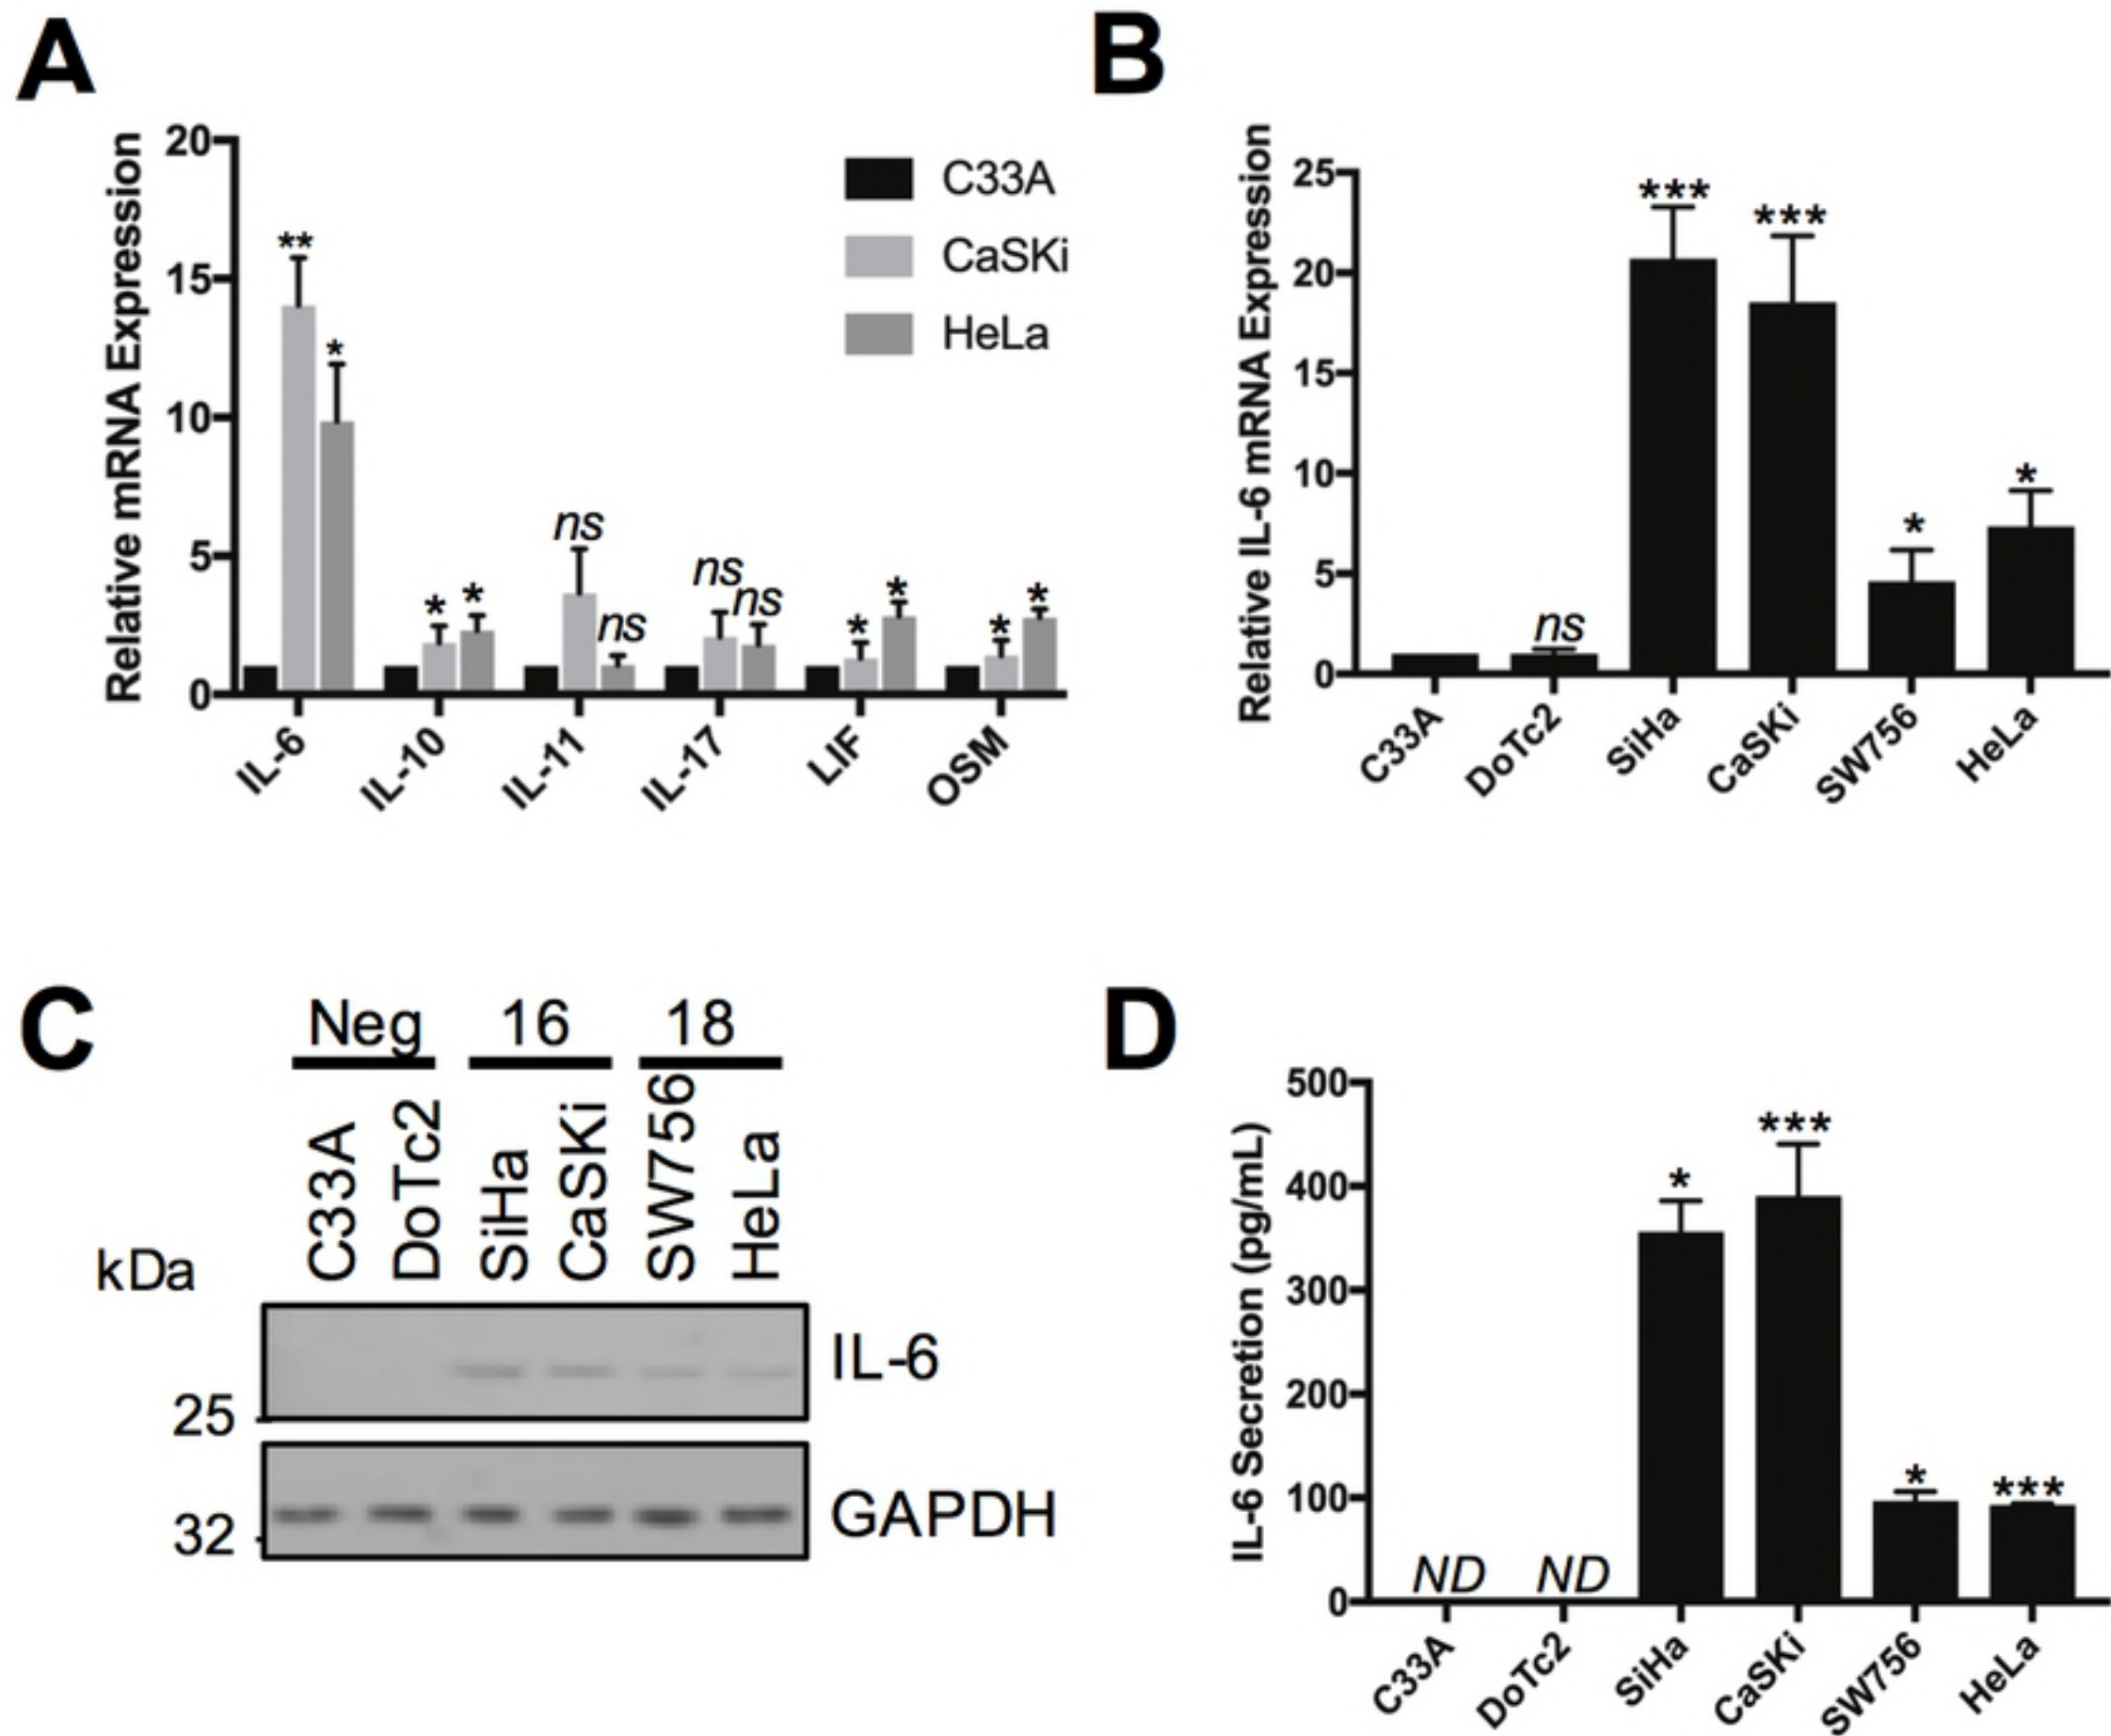

Figure

**A**

bioRxiv preprint doi: <https://doi.org/10.1101/507954>; this version posted December 29, 2018. The copyright holder for this preprint (which was not certified by peer review) is the author/funder, who has granted bioRxiv a license to display the preprint in perpetuity. It is made available under aCC-BY 4.0 International license.

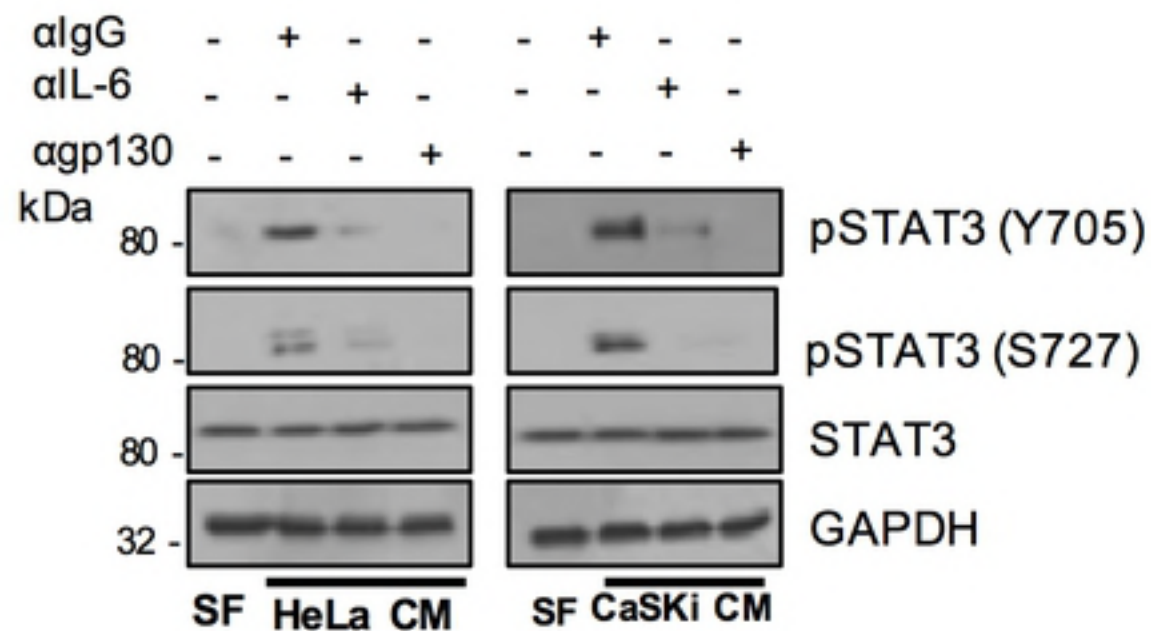**B**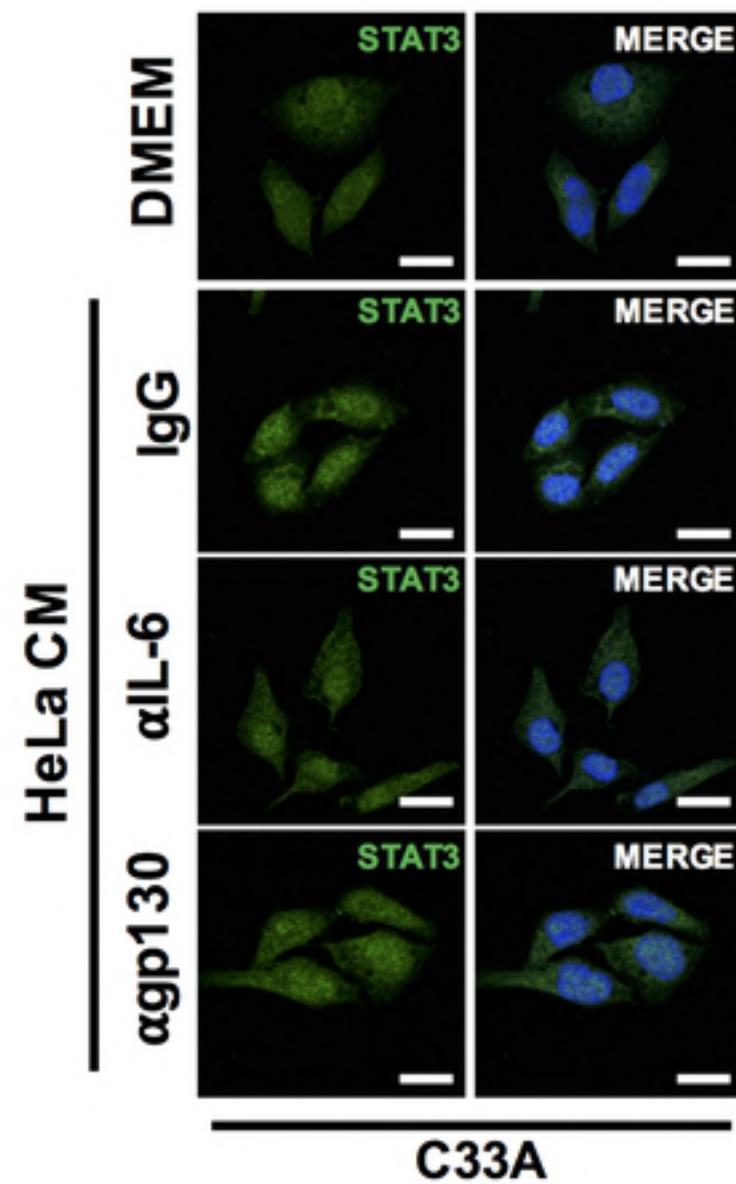**C**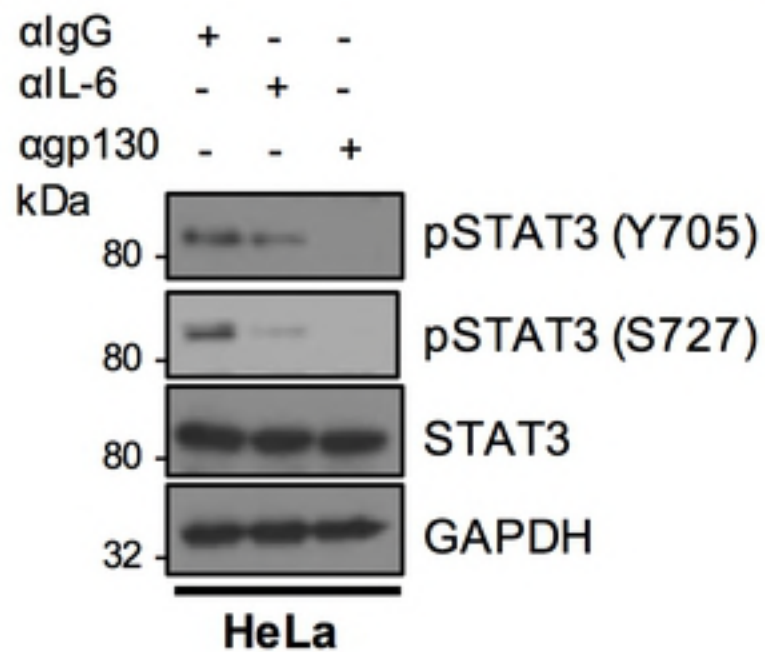**D**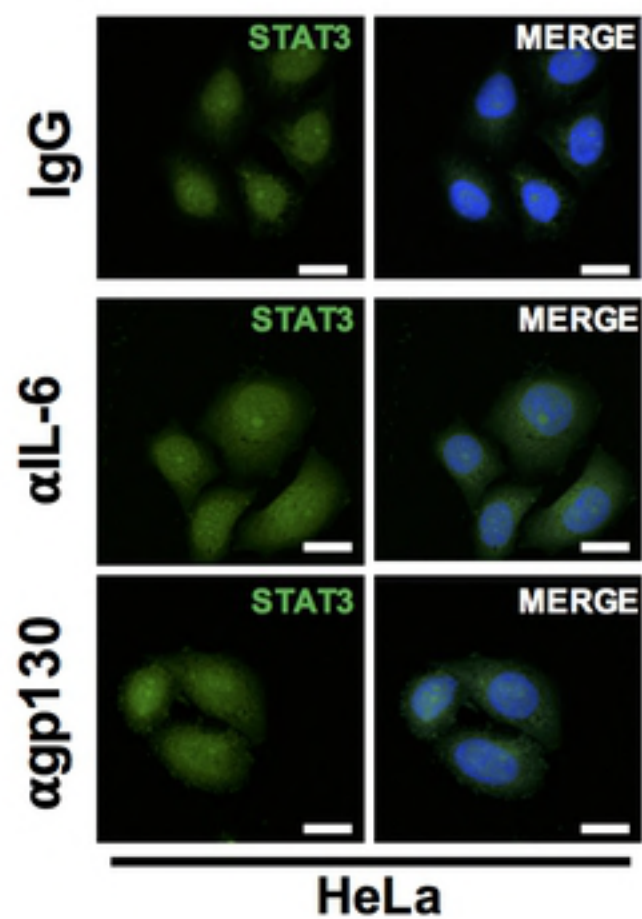



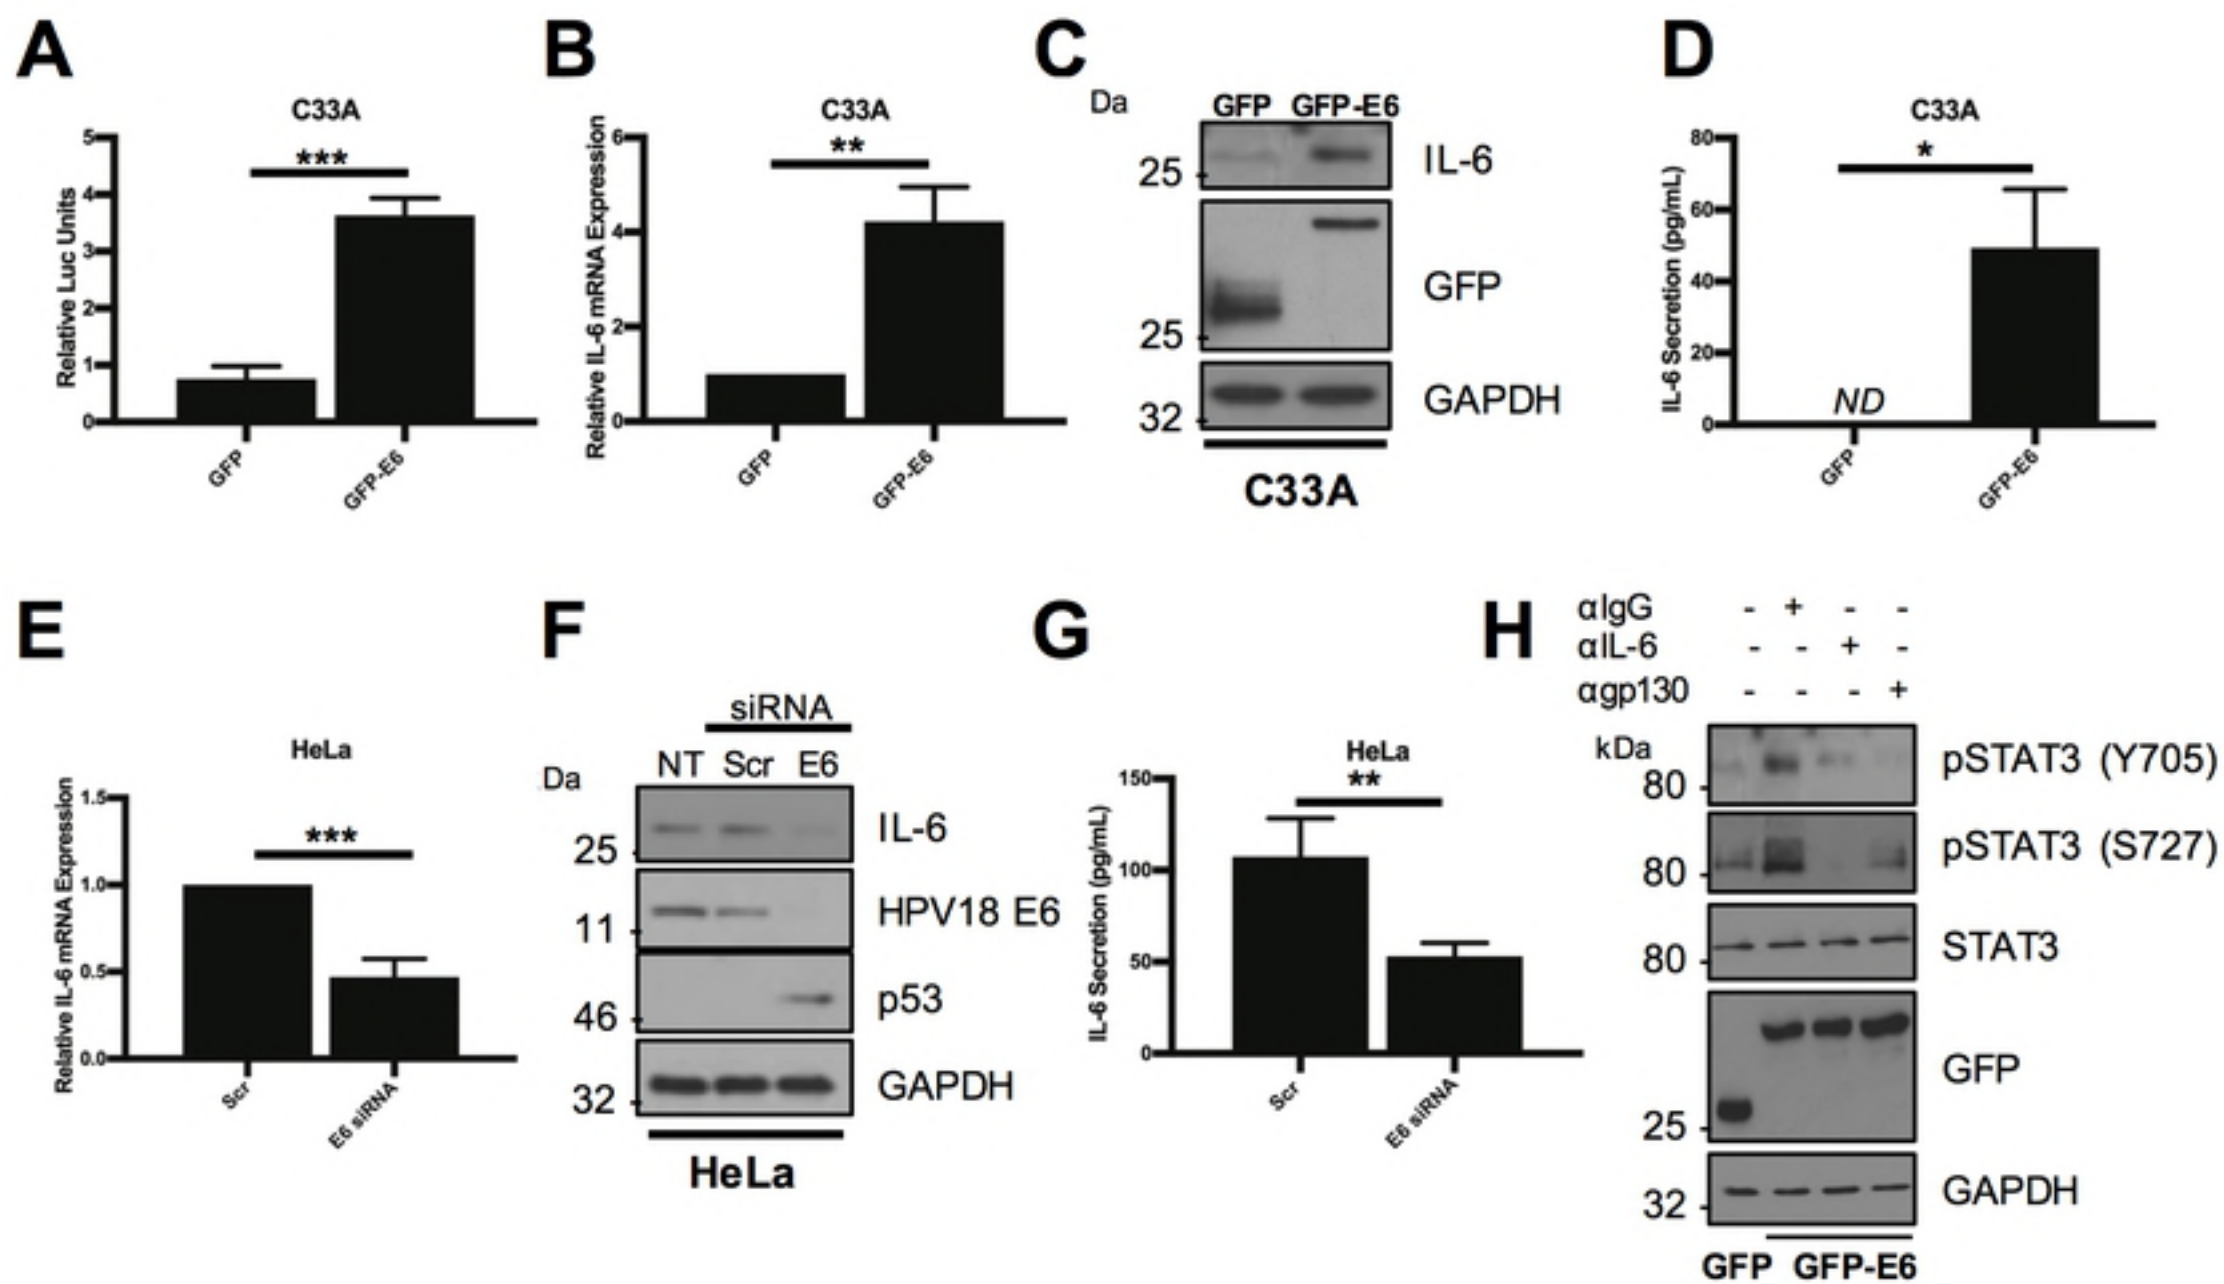

Figure

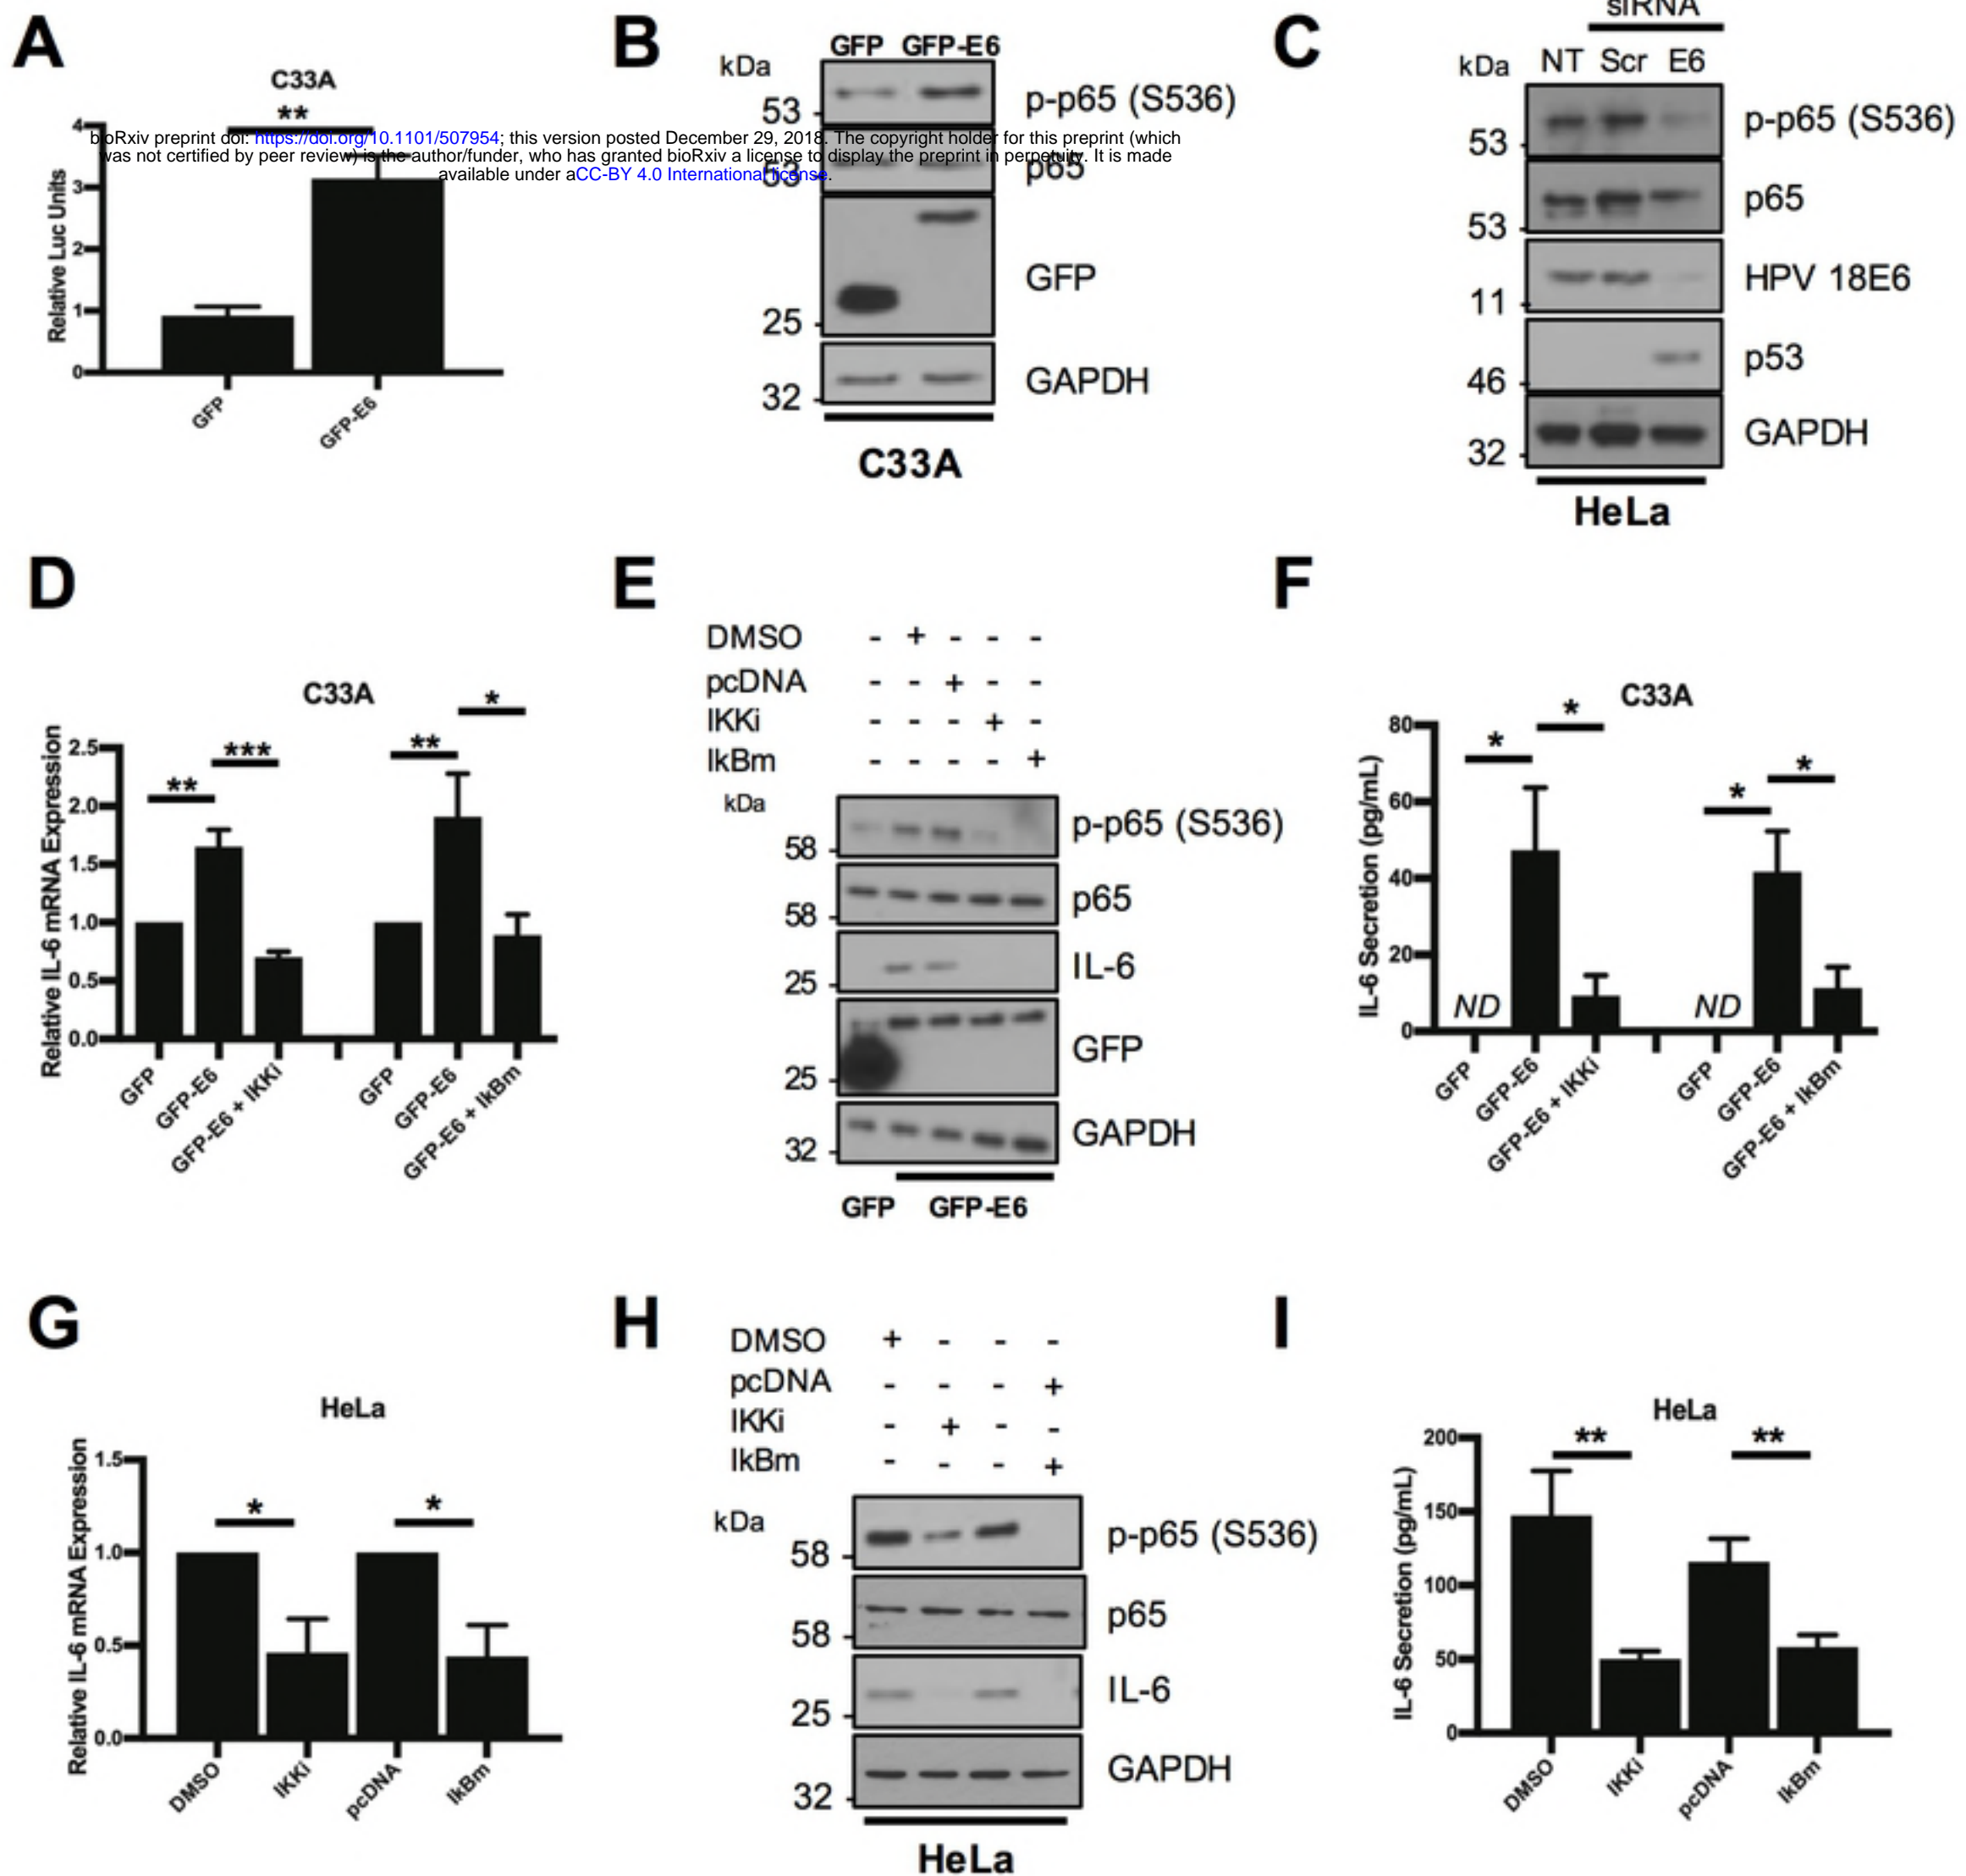

Figure

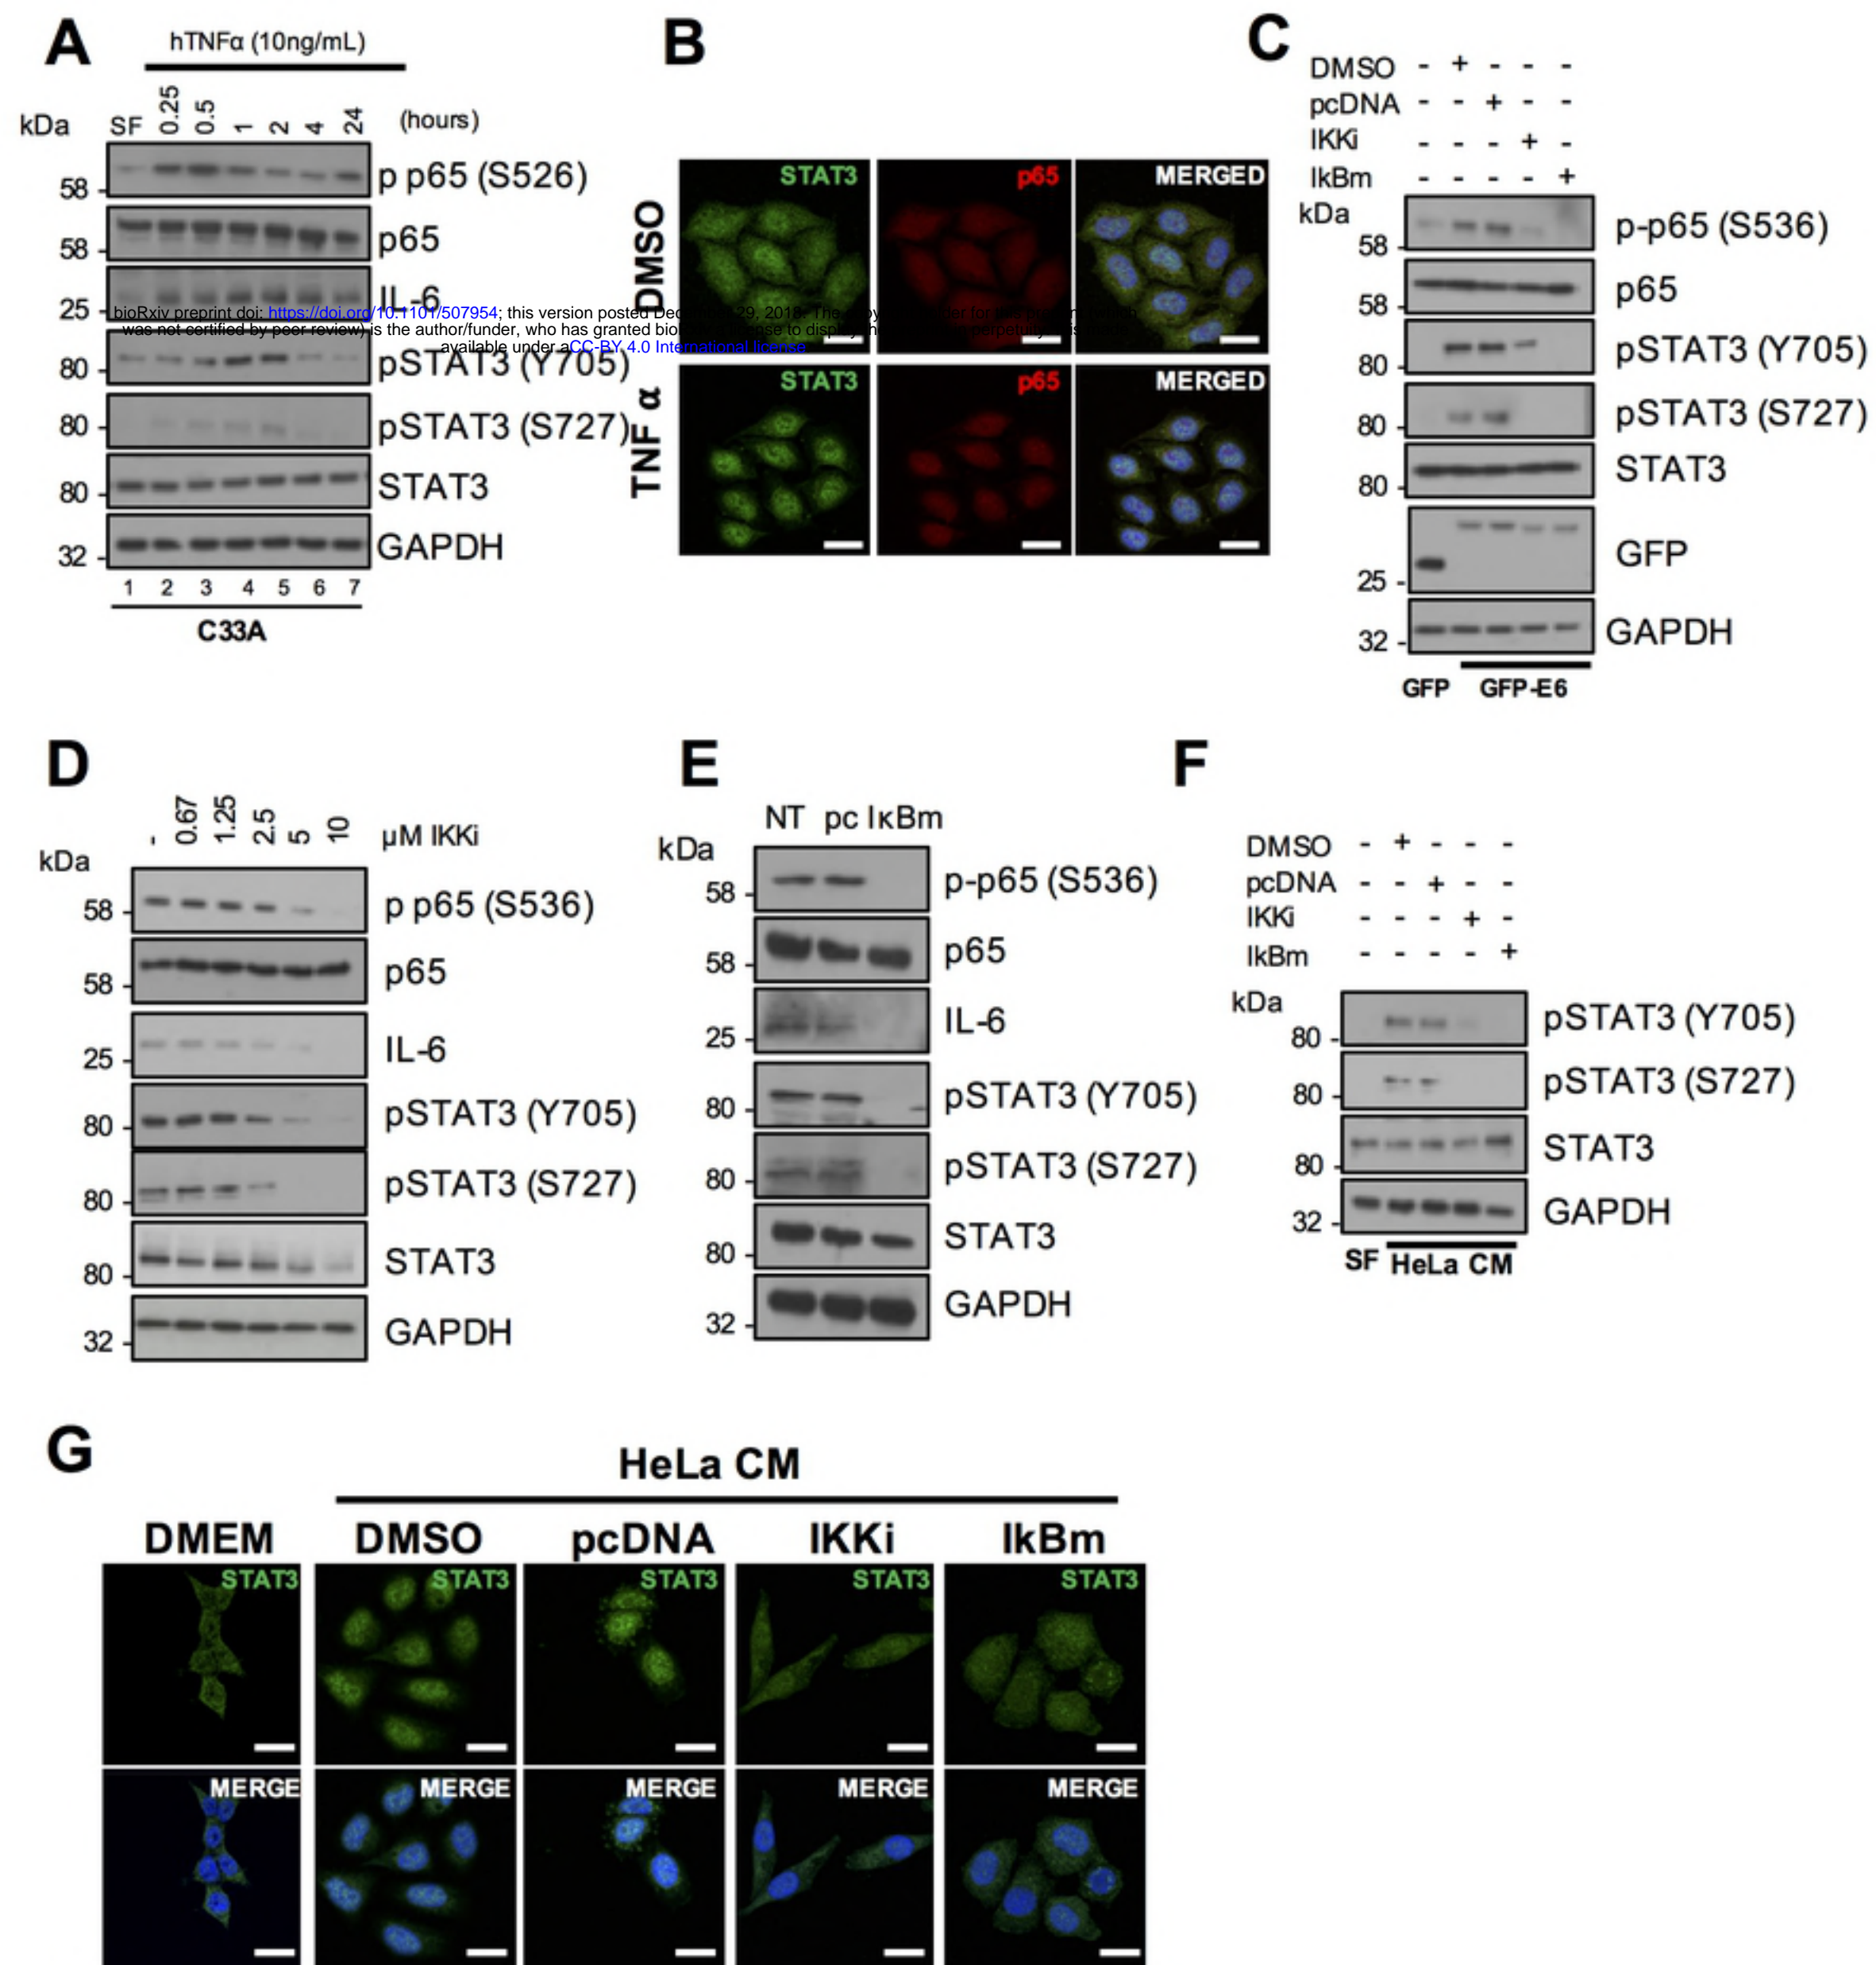

Figure

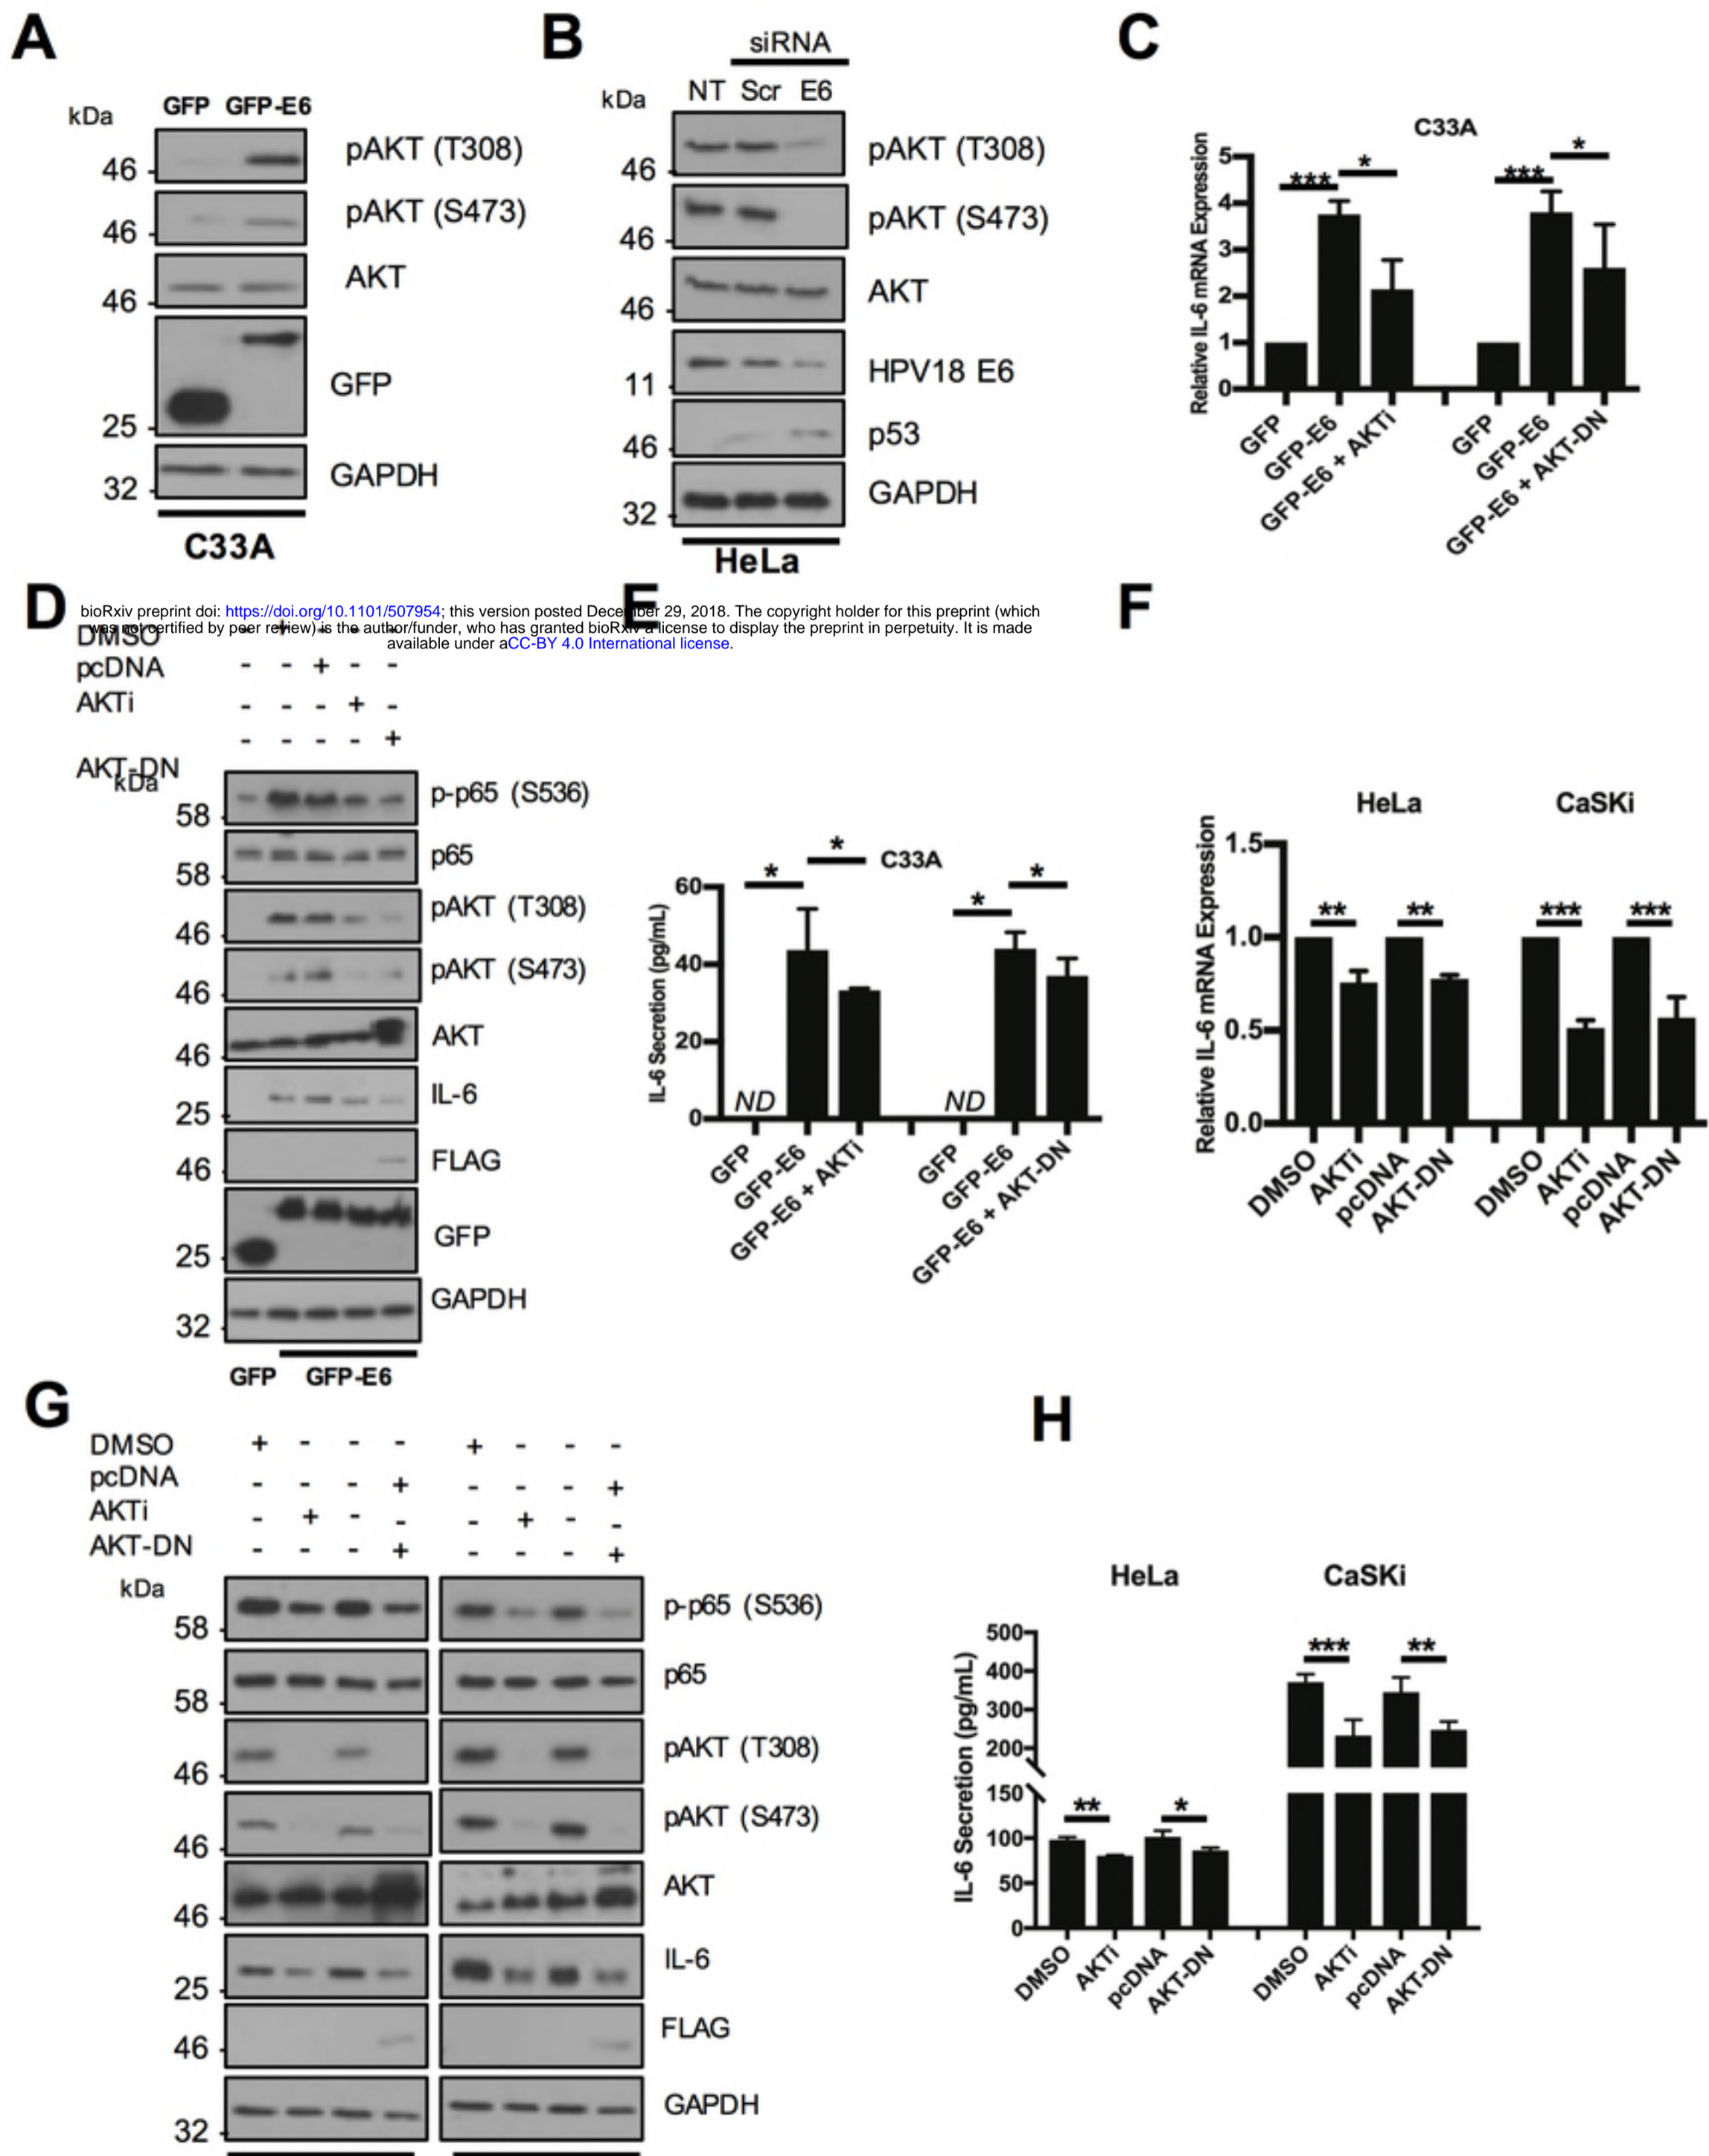

Figure

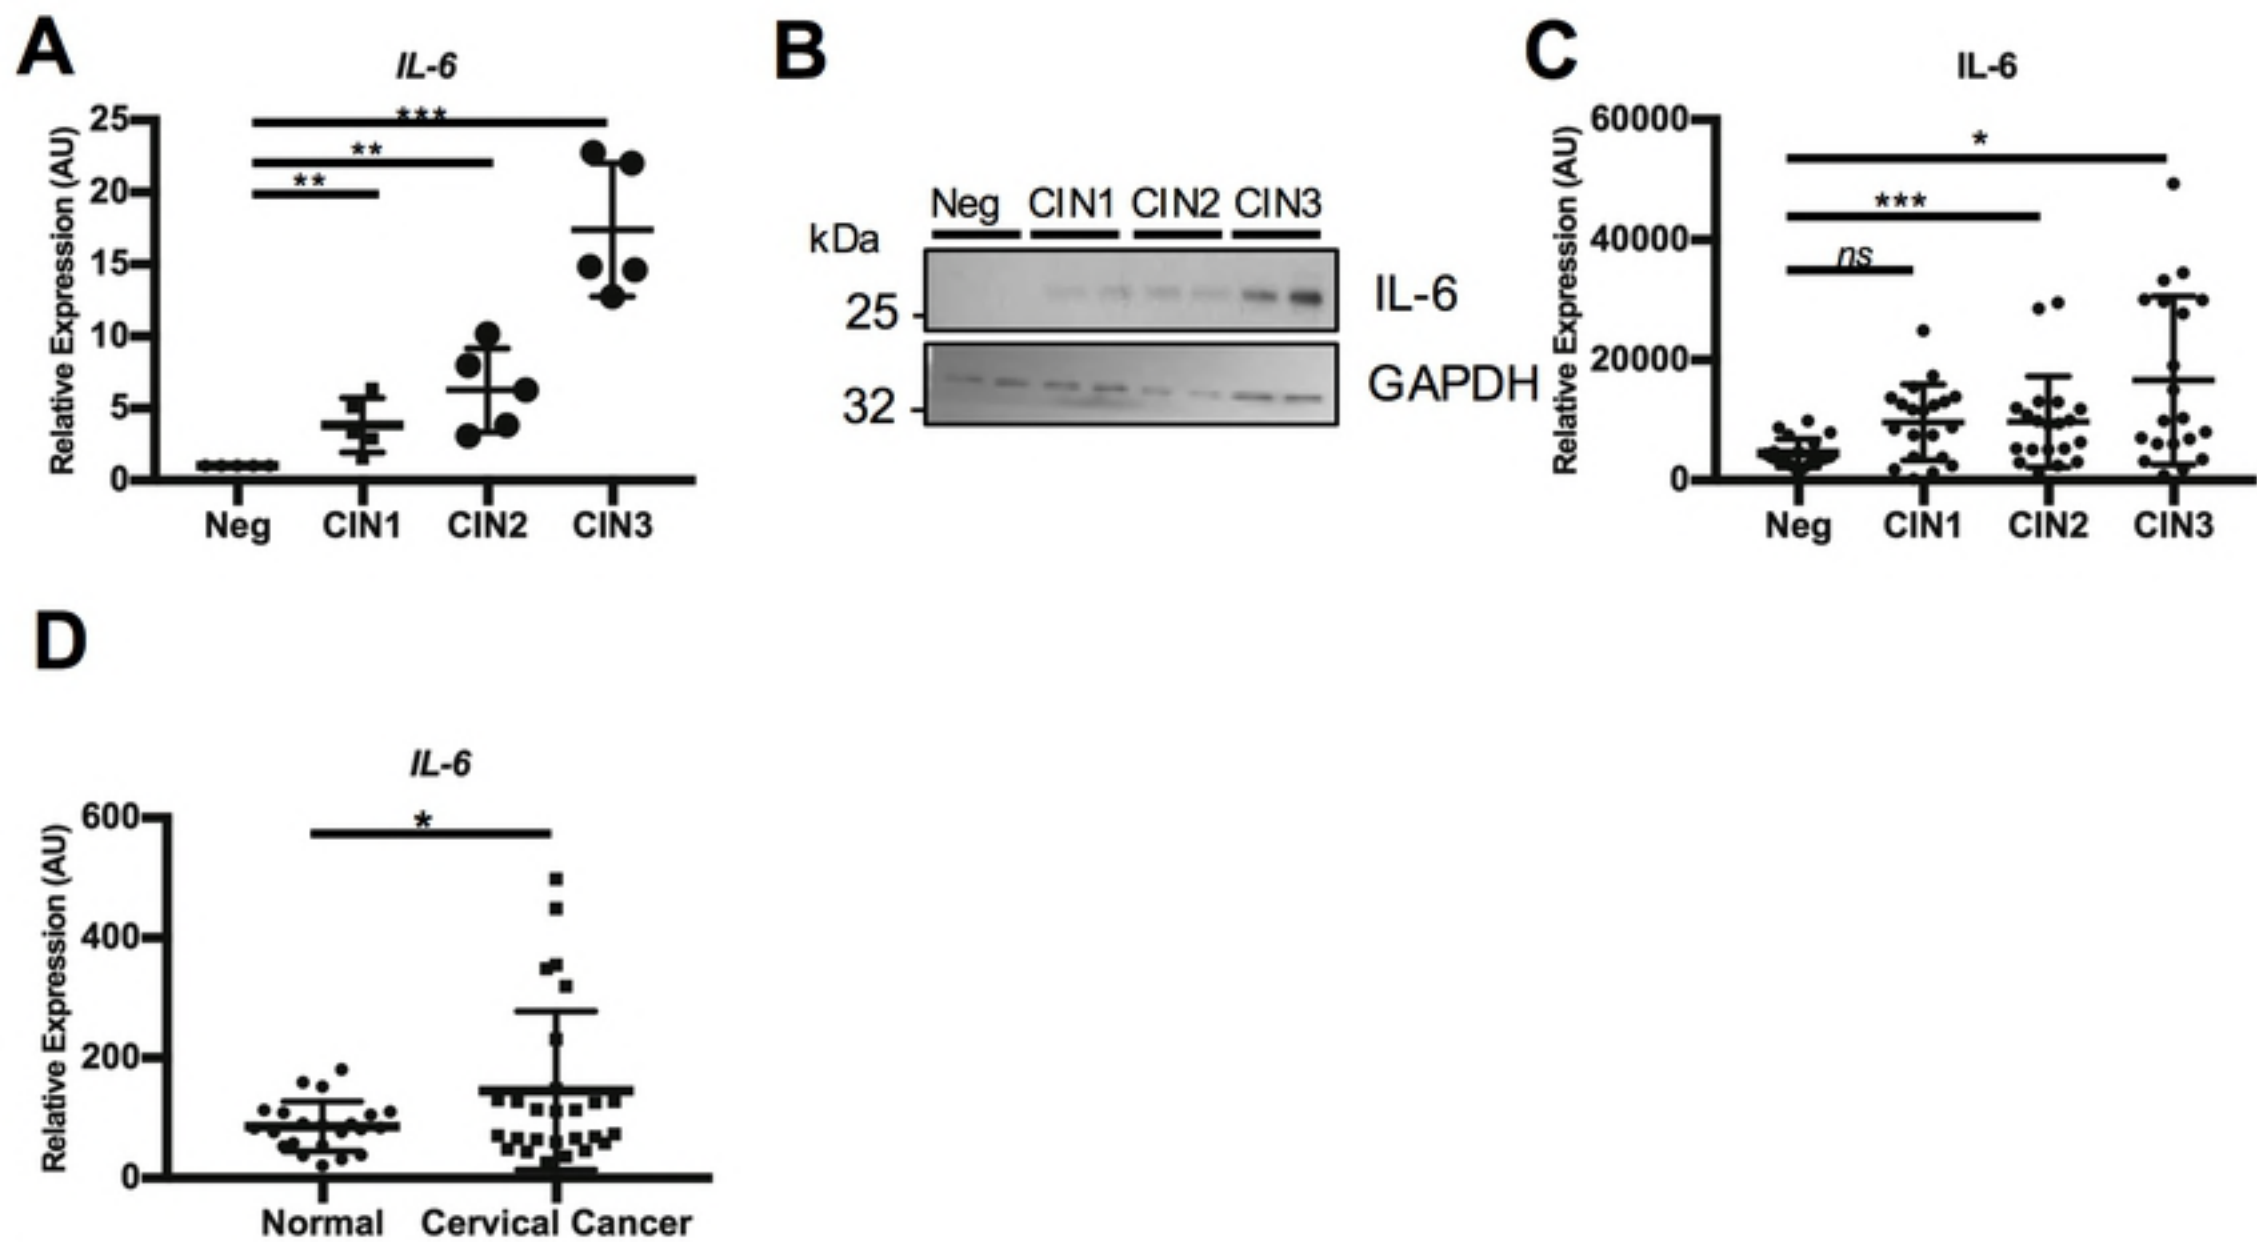

Figure

cytoplasm

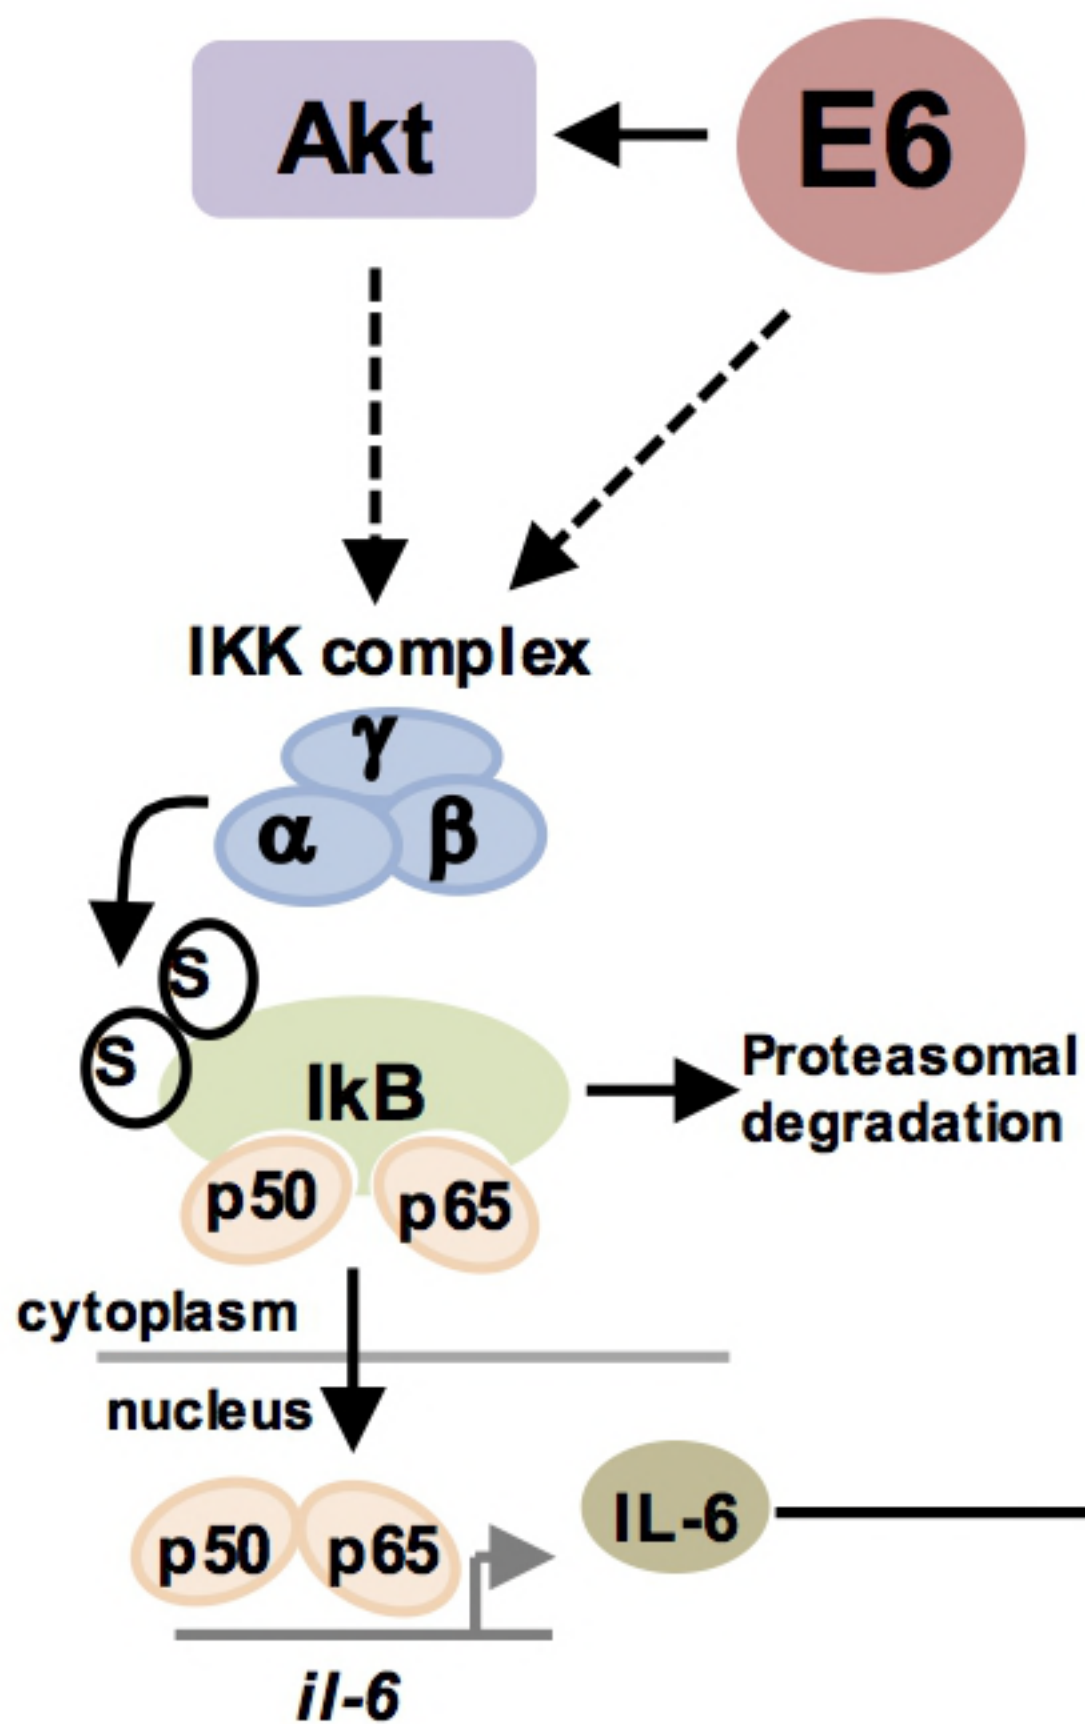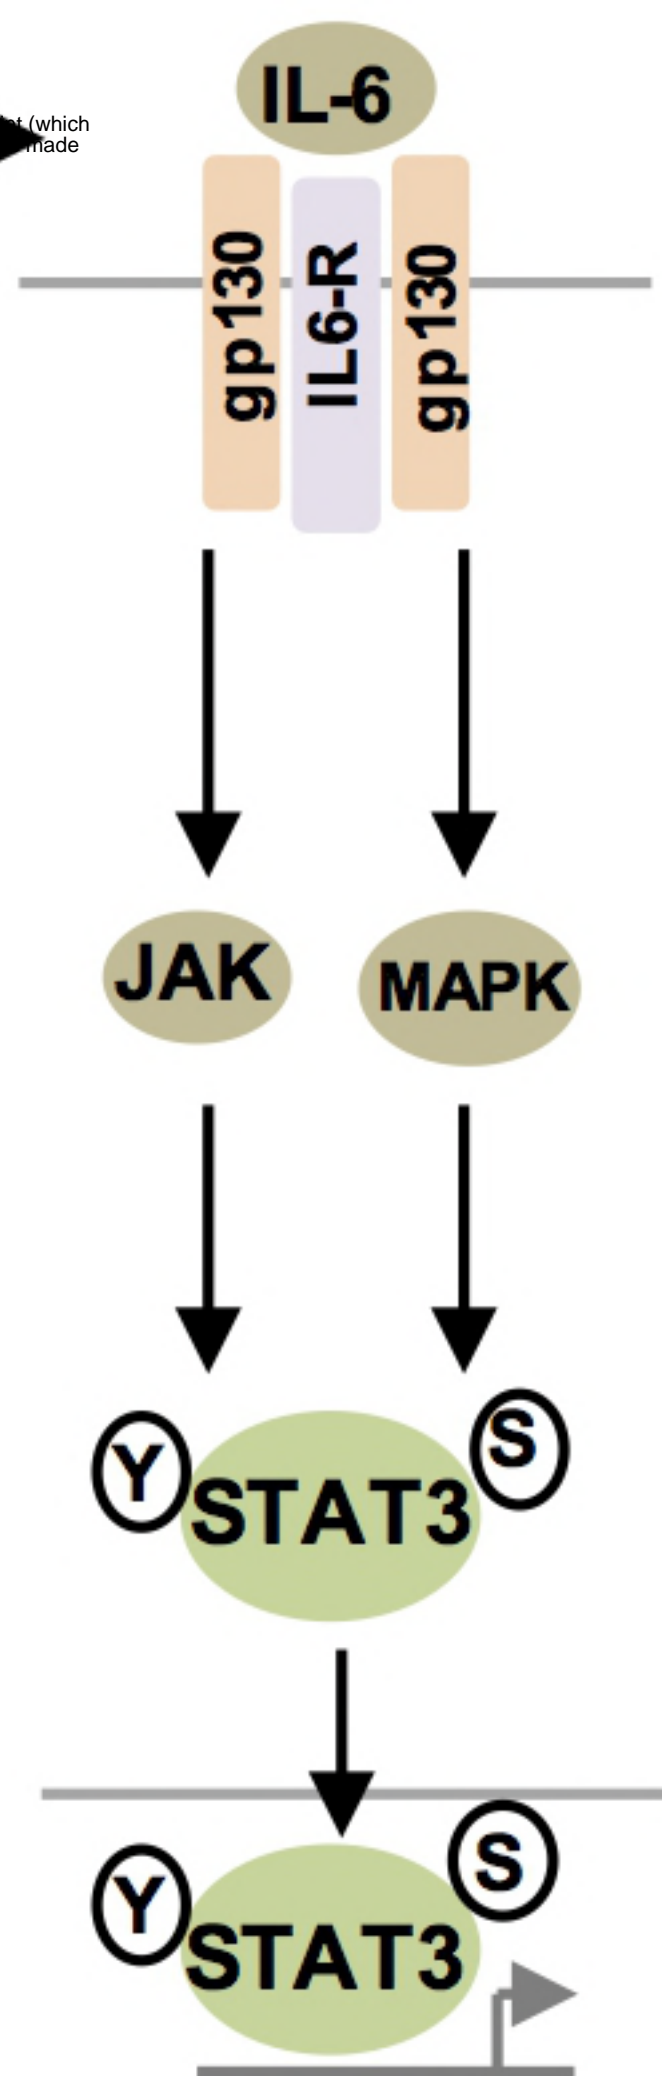

Figure
